# Supplementary material for: Secosteroids and Norcembranoids from the Soft Coral Sinularia nanolobata
Source: Mar Drugs. 2013 Aug 27;11(9):3288–96. doi: 10.3390/md11093288 (PMC3801121; doi:10.3390/md11093288)

## Supplementary Materials

### Table of Contents

|                                                                                                    |    |
|----------------------------------------------------------------------------------------------------|----|
| <b>Figure S1.</b> $^1\text{H}$ NMR spectrum (400 MHz) of compound <b>1</b> in $\text{CDCl}_3$ .    | 2  |
| <b>Figure S2.</b> $^{13}\text{C}$ NMR spectrum (100 MHz) of compound <b>1</b> in $\text{CDCl}_3$ . | 3  |
| <b>Figure S3.</b> DEPT spectrum (100 MHz) of compound <b>1</b> in $\text{CDCl}_3$ .                | 4  |
| <b>Figure S4.</b> COSY spectrum (400 MHz) of compound <b>1</b> in $\text{CDCl}_3$ .                | 5  |
| <b>Figure S5.</b> HSQC spectrum (400 MHz) of compound <b>1</b> in $\text{CDCl}_3$ .                | 6  |
| <b>Figure S6.</b> HMBC spectrum (400 MHz) of compound <b>1</b> in $\text{CDCl}_3$ .                | 7  |
| <b>Figure S7.</b> NOESY spectrum (400 MHz) of compound <b>1</b> in $\text{CDCl}_3$ .               | 8  |
| <b>Figure S8.</b> $^1\text{H}$ NMR spectrum (400 MHz) of compound <b>2</b> in $\text{CDCl}_3$ .    | 9  |
| <b>Figure S9.</b> $^{13}\text{C}$ NMR spectrum (400 MHz) of compound <b>2</b> in $\text{CDCl}_3$ . | 10 |
| <b>Figure S10.</b> COSY spectrum (400 MHz) of compound <b>2</b> in $\text{CDCl}_3$ .               | 11 |
| <b>Figure S11.</b> HSQC spectrum (400 MHz) of compound <b>2</b> in $\text{CDCl}_3$ .               | 12 |
| <b>Figure S12.</b> HMBC spectrum (400 MHz) of compound <b>2</b> in $\text{CDCl}_3$ .               | 13 |
| <b>Figure S13.</b> NOESY spectrum (400 MHz) of compound <b>2</b> in $\text{CDCl}_3$ .              | 14 |

**Figure S1.**  $^1\text{H}$  NMR spectrum (400 MHz) of compound **1** in  $\text{CDCl}_3$ .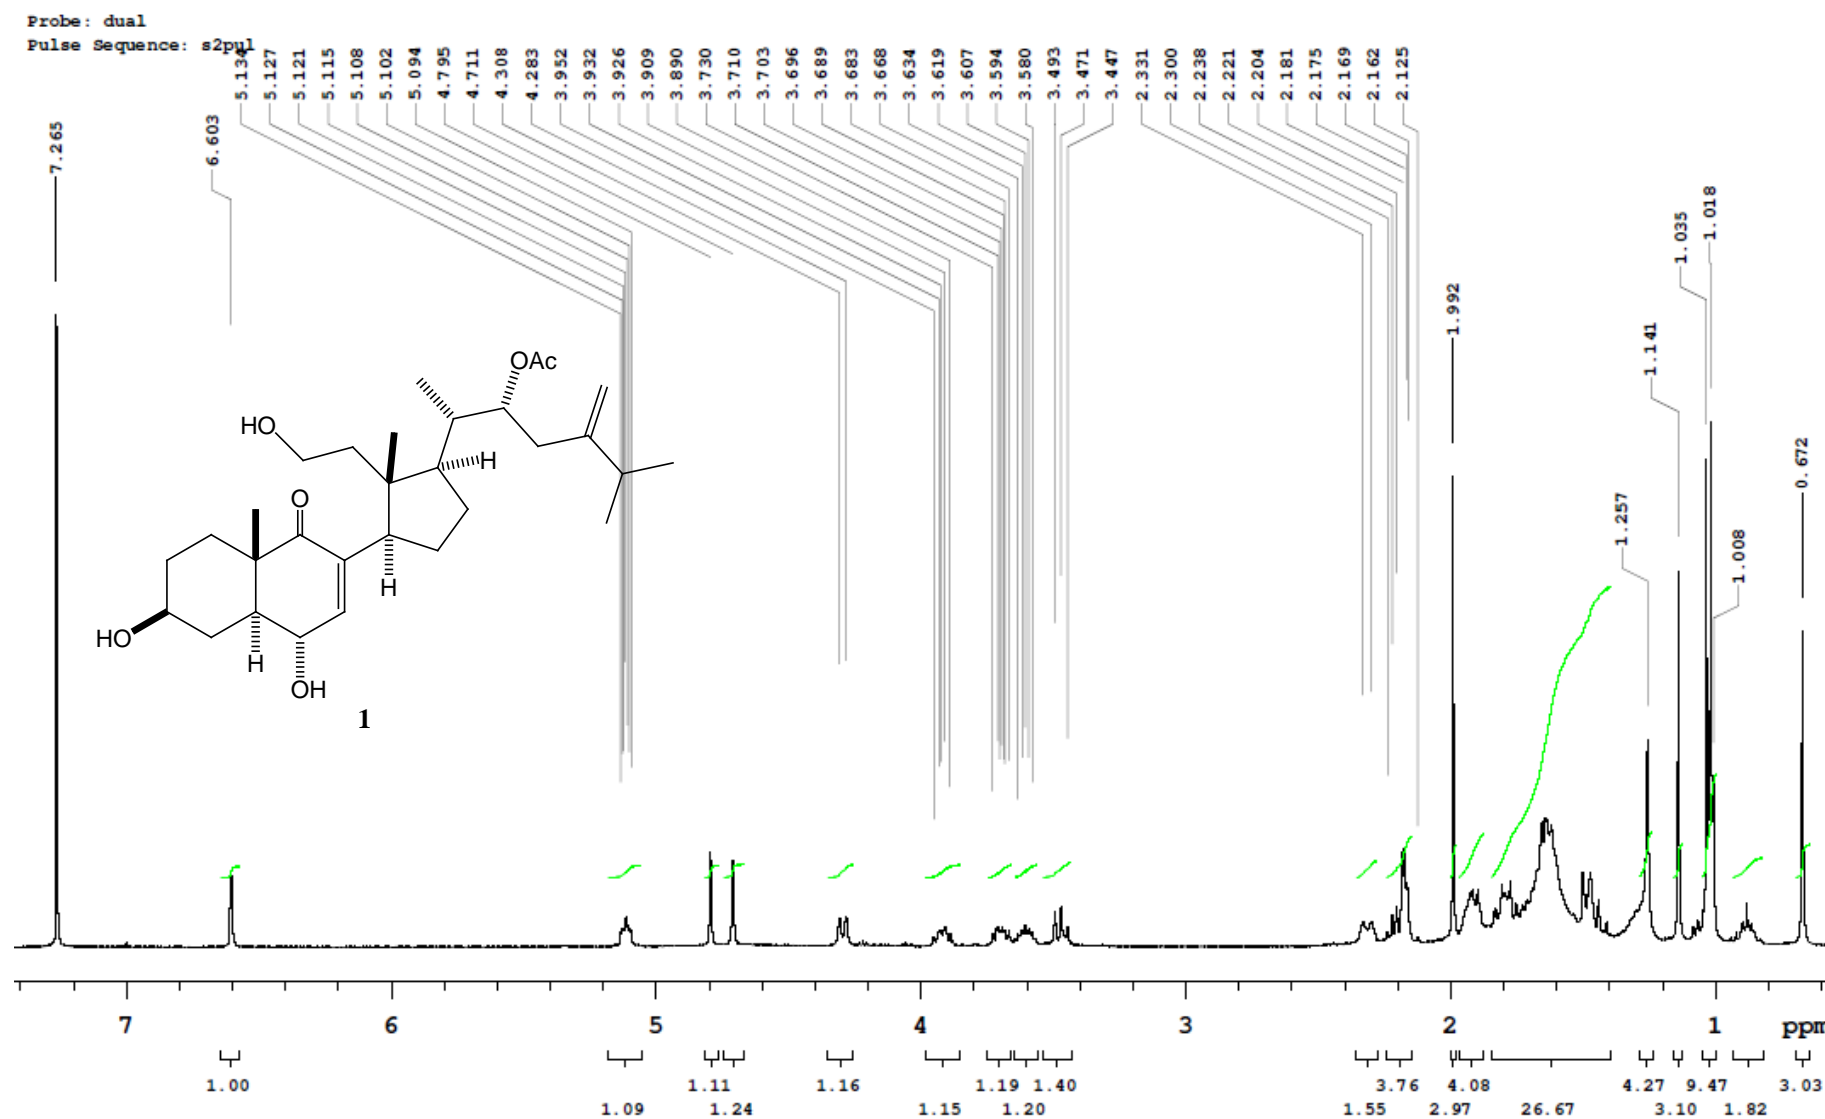

**Figure S2.**  $^{13}\text{C}$  NMR spectrum (100 MHz) of compound **1** in  $\text{CDCl}_3$ .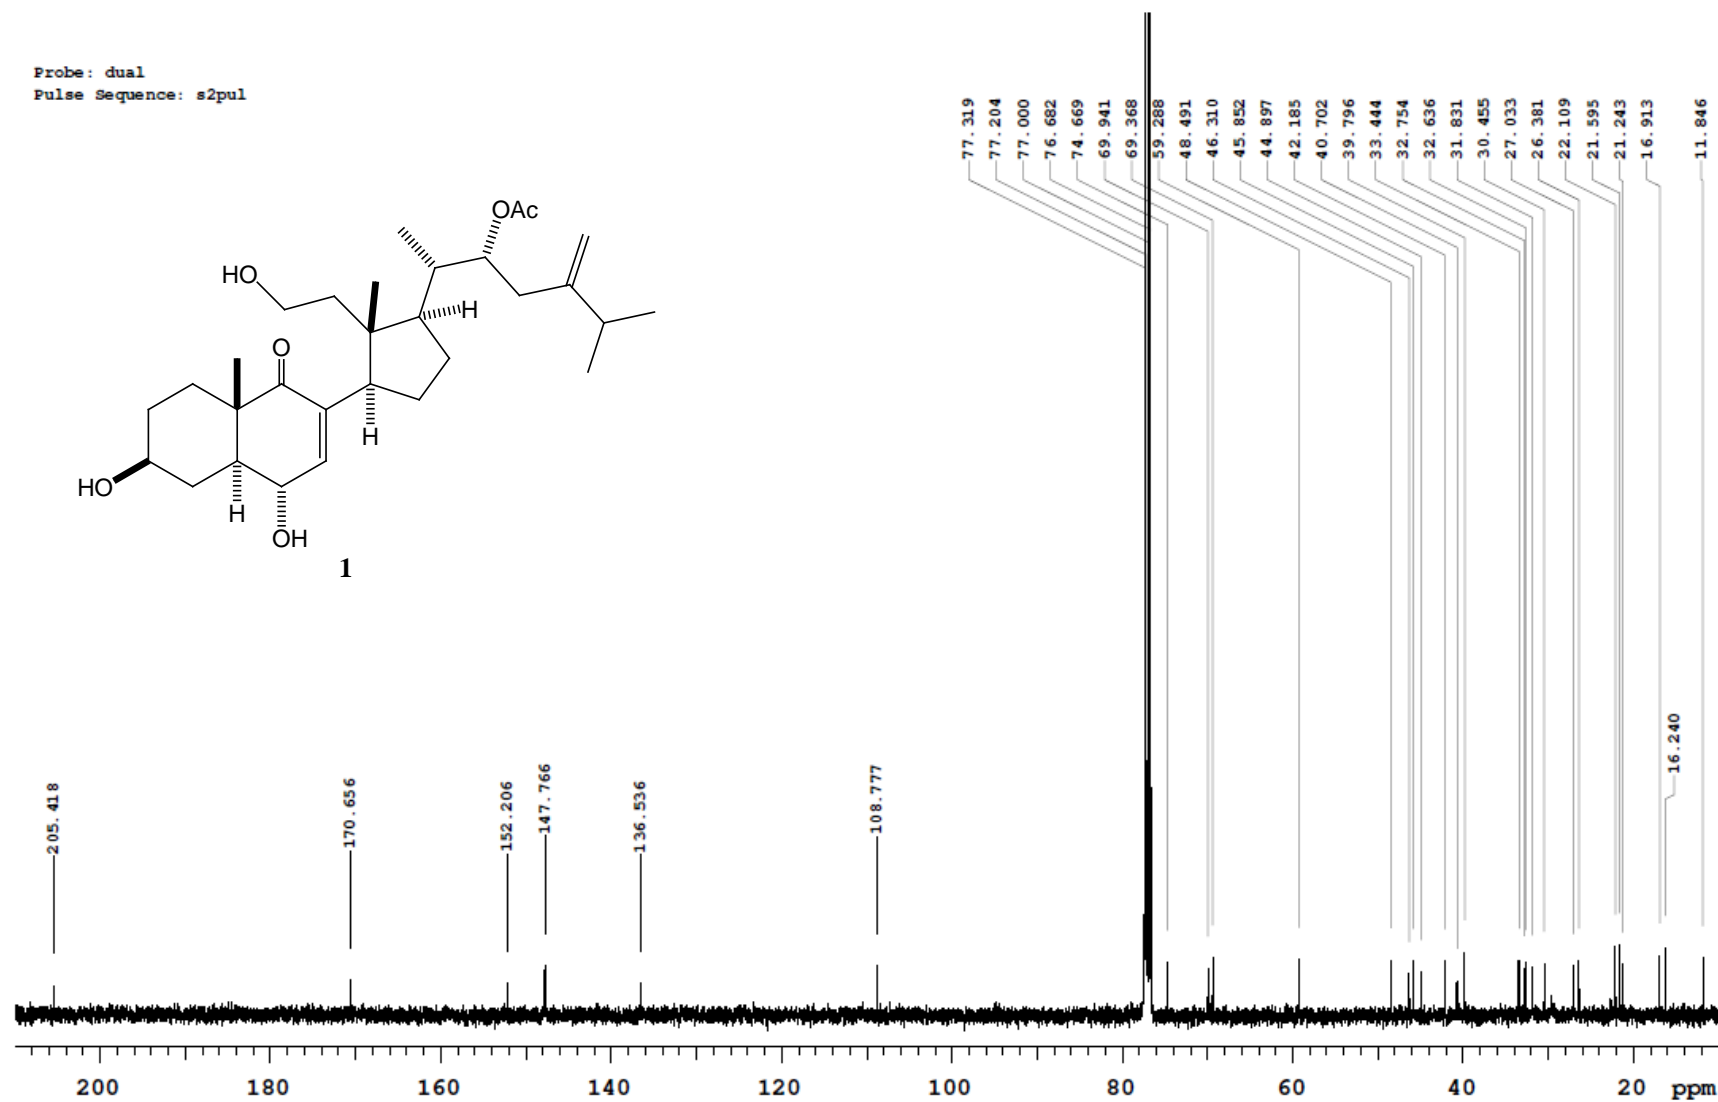

Figure S3. DEPT spectrum (400 MHz) of compound 1 in CDCl<sub>3</sub>.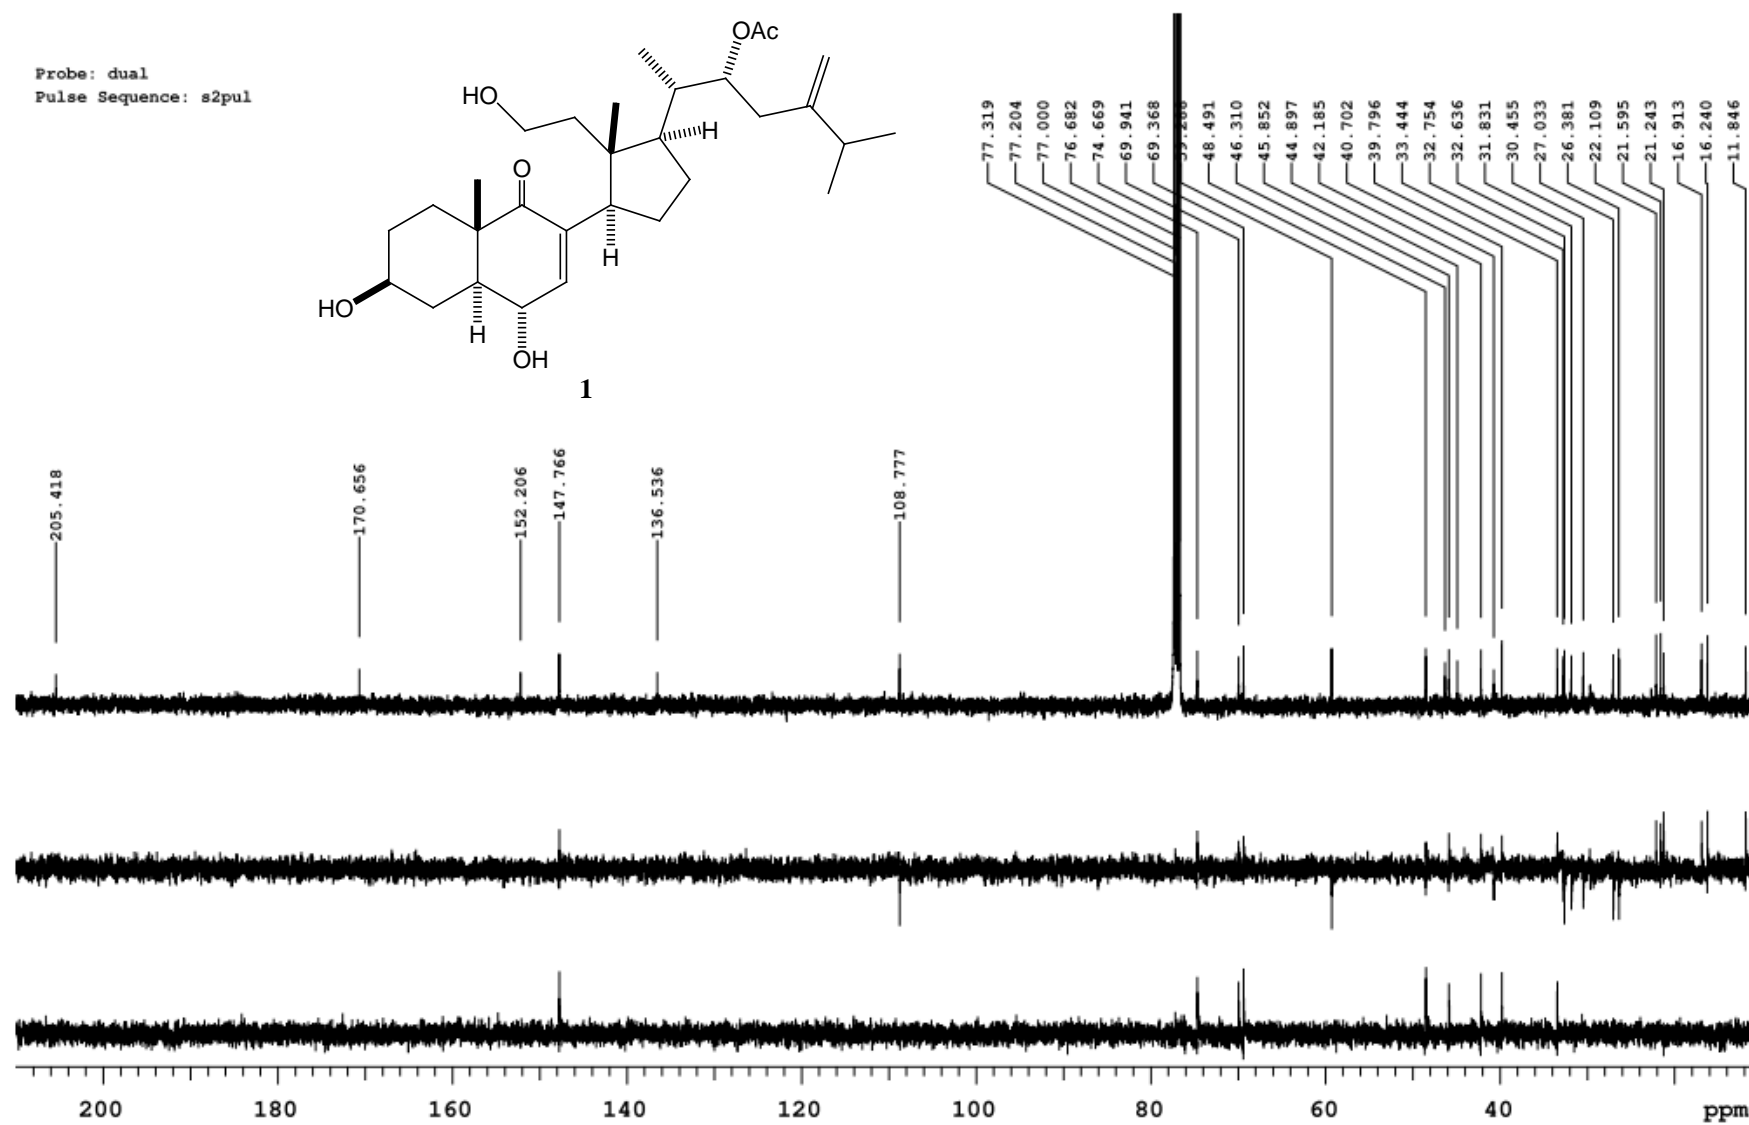

**Figure S4.** COSY spectrum (400 MHz) of compound **1** in CDCl<sub>3</sub>.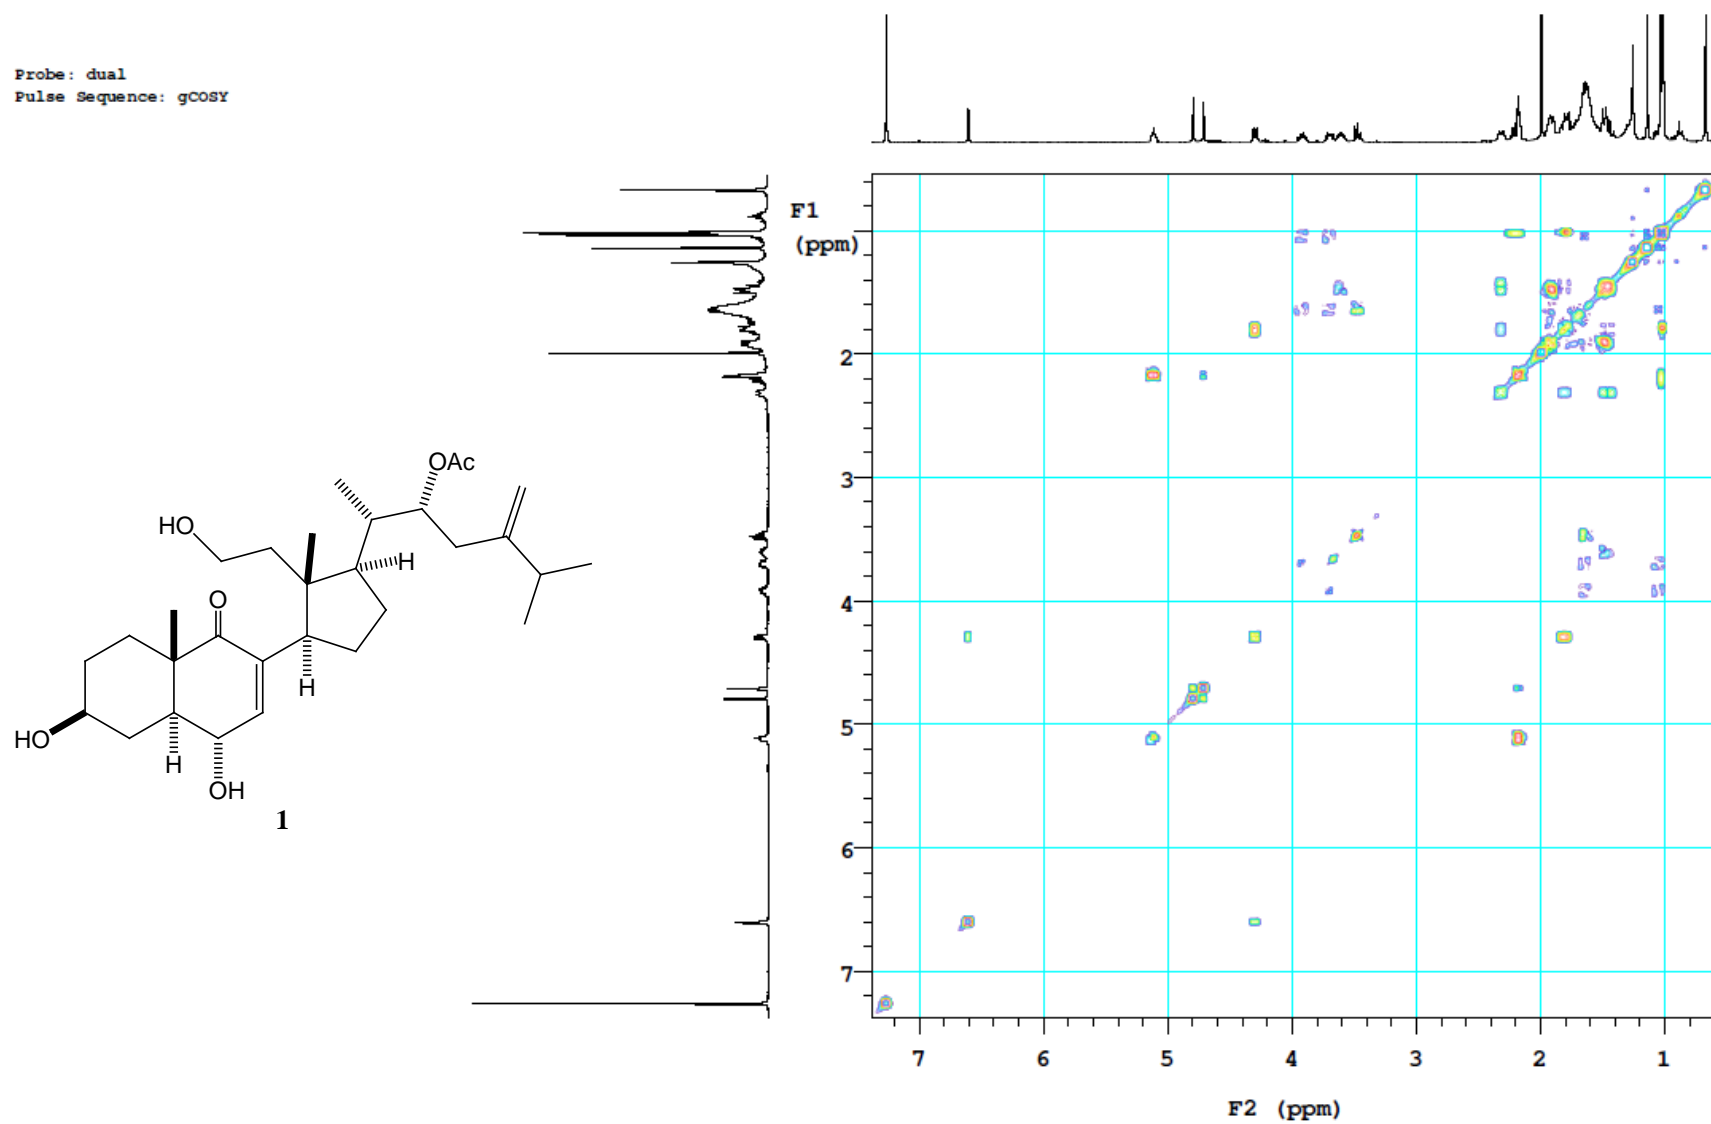

Figure S5. HSQC spectrum (400 MHz) of compound **1** in CDCl<sub>3</sub>.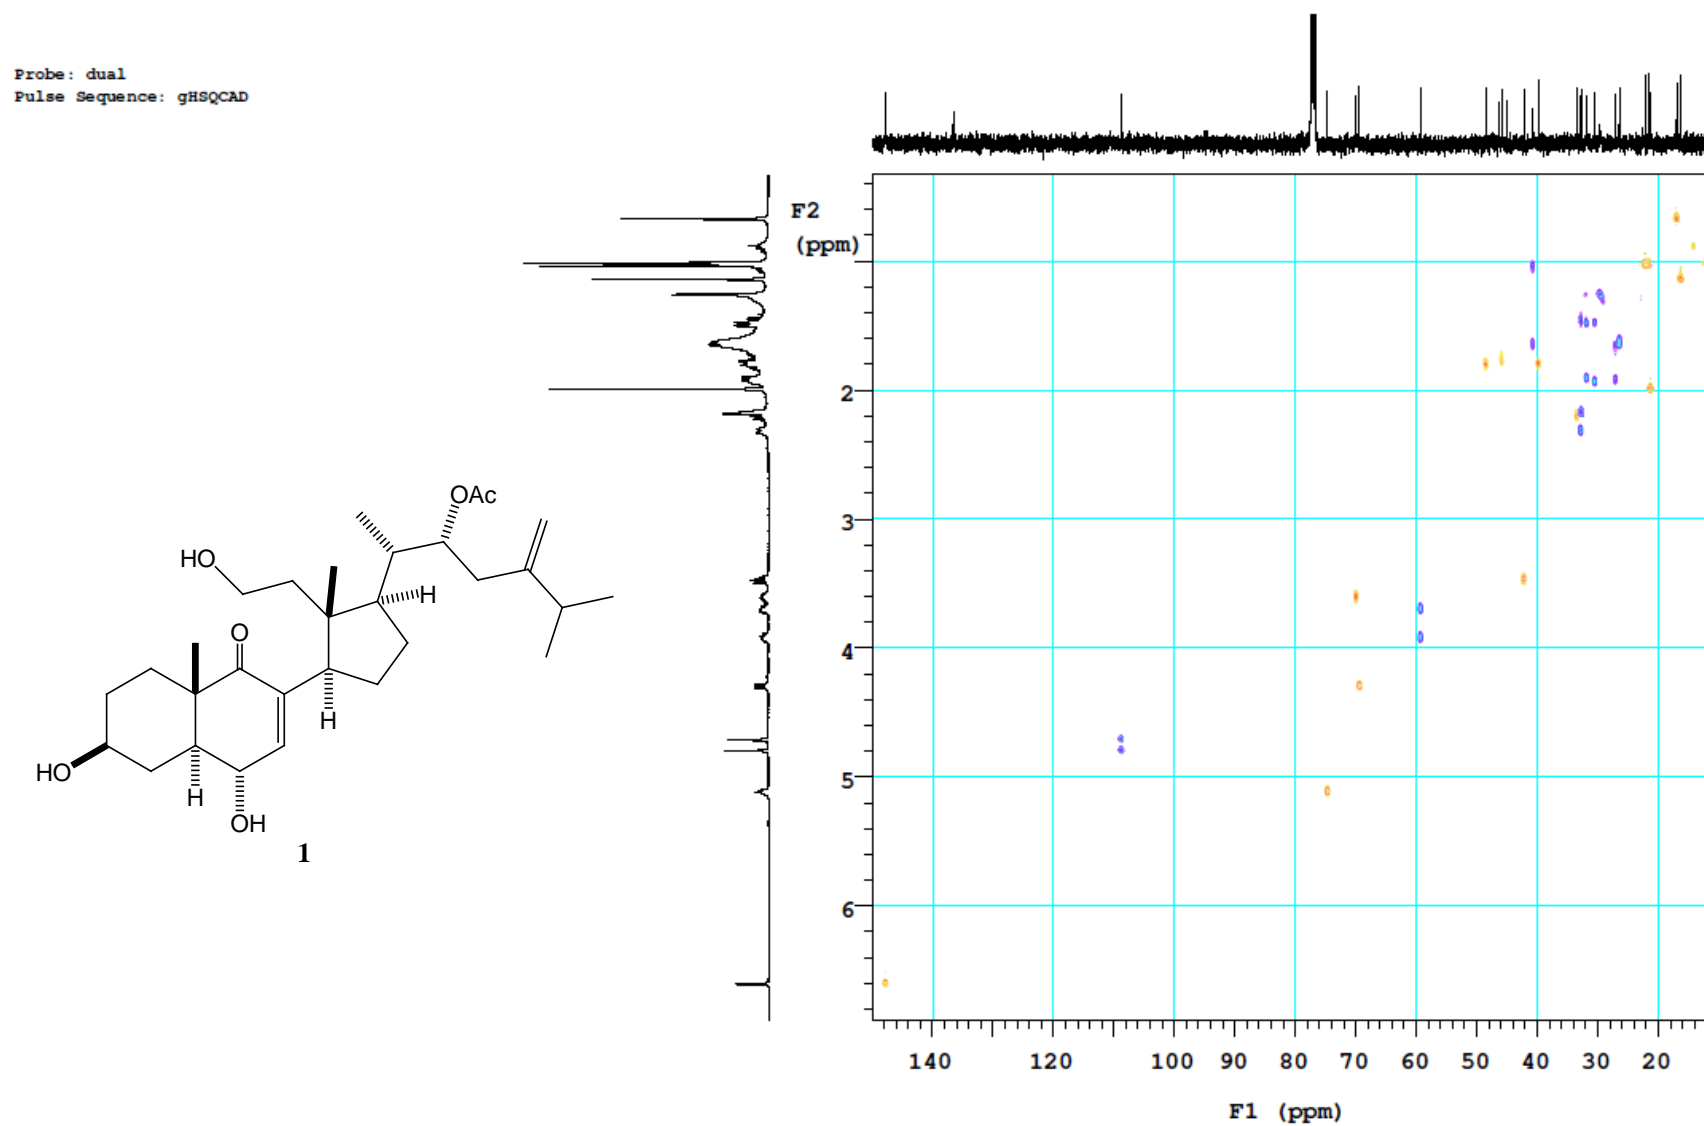

**Figure S6.** HMBC spectrum (400 MHz) of compound **1** in CDCl<sub>3</sub>.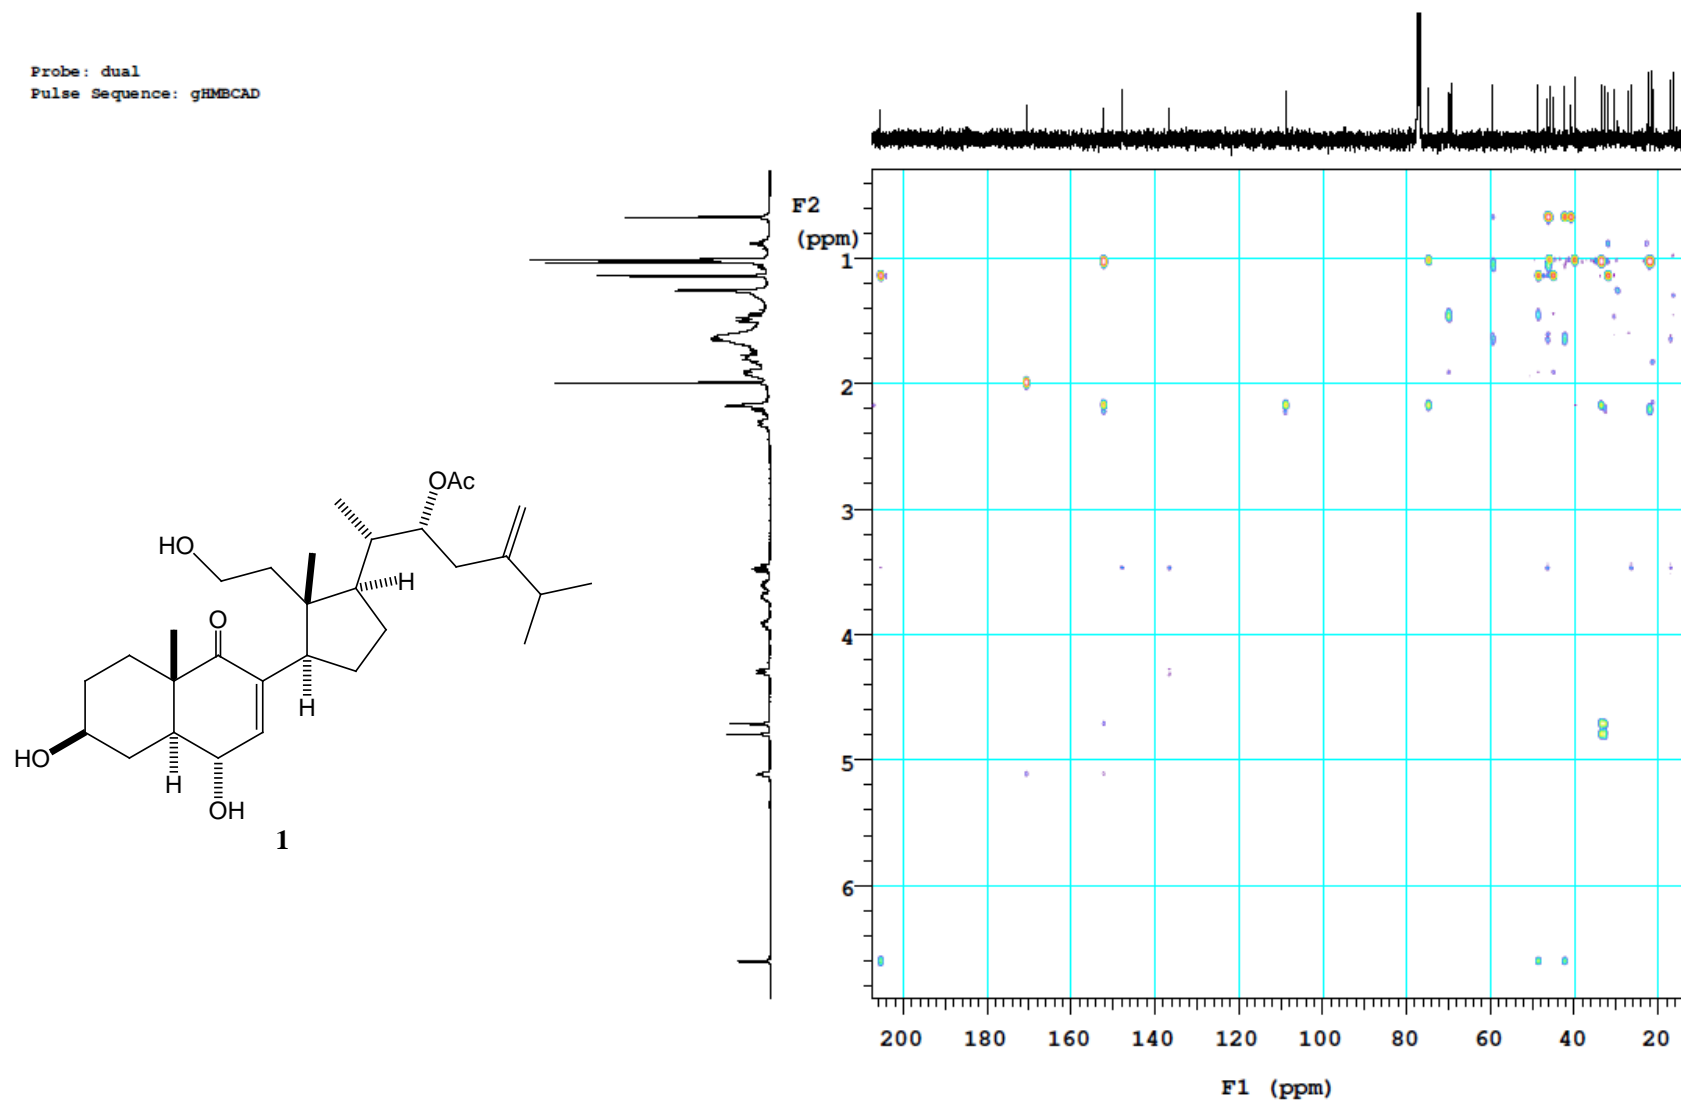

**Figure S7.** NOESY spectrum (400 MHz) of compound **1** in CDCl<sub>3</sub>.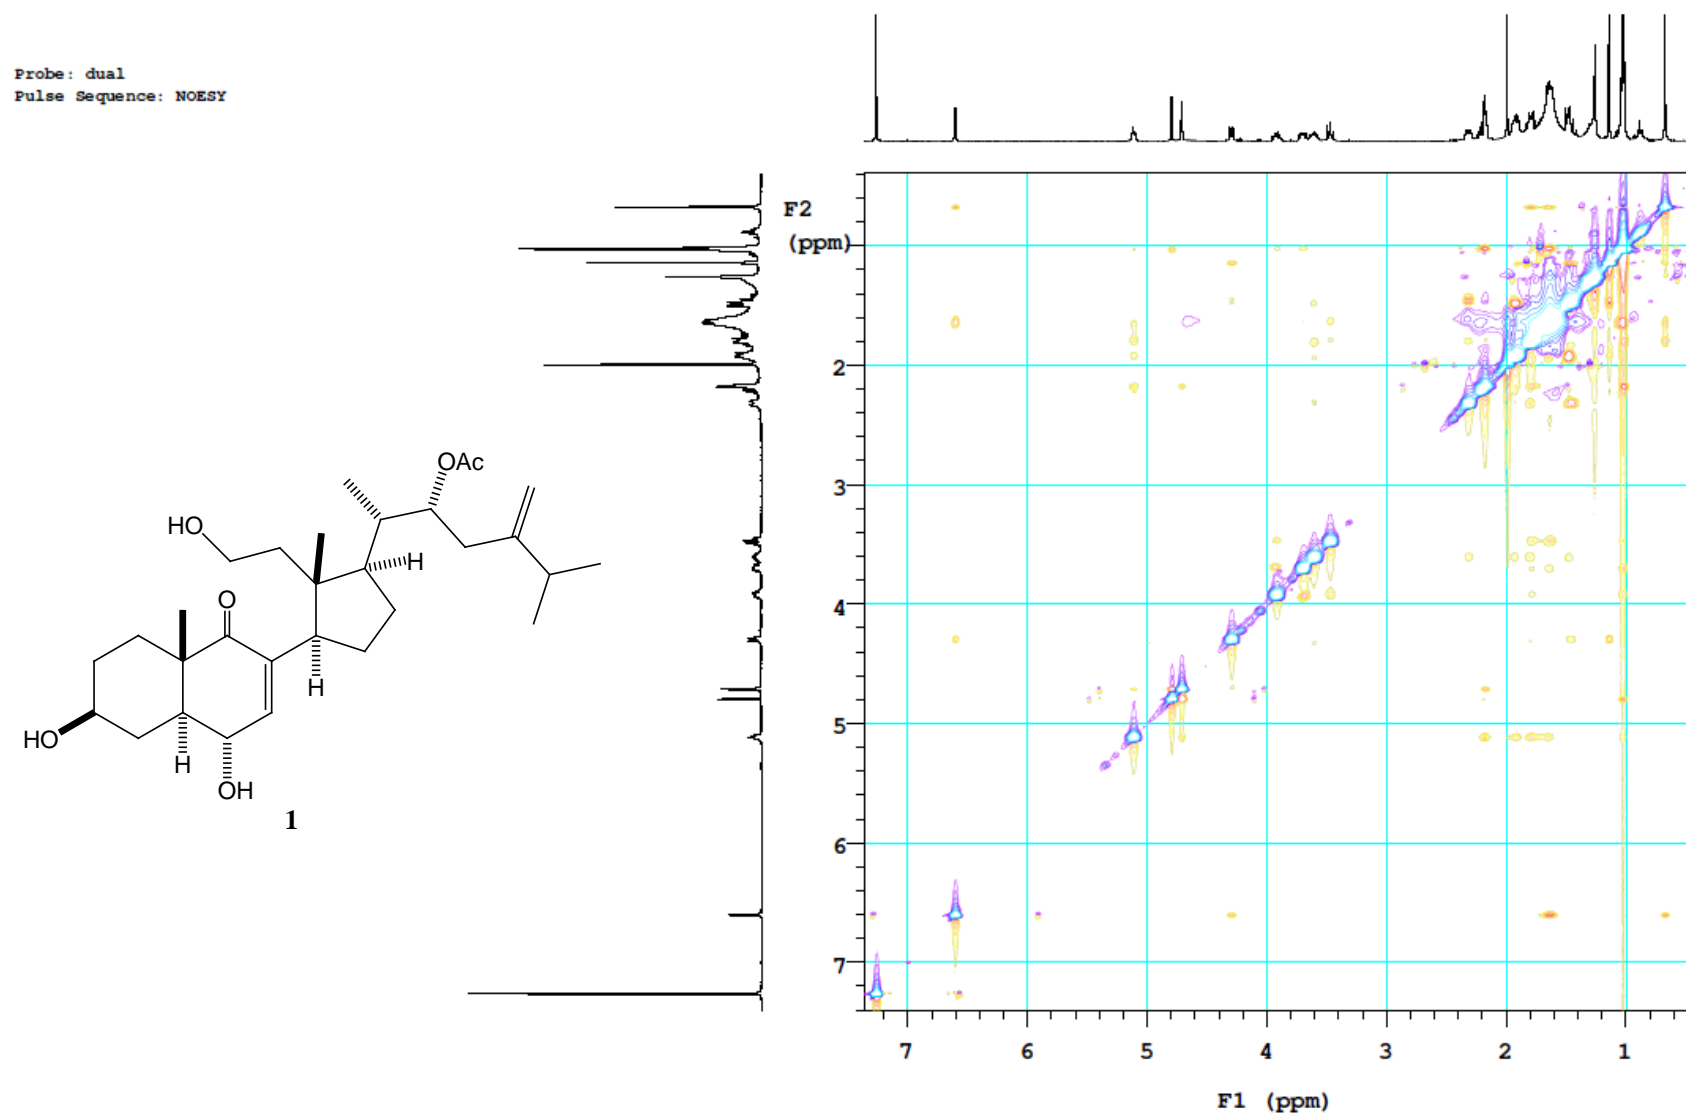

**Figure S8.**  $^1\text{H}$  NMR spectrum (400 MHz) of compound **2** in  $\text{CDCl}_3$ .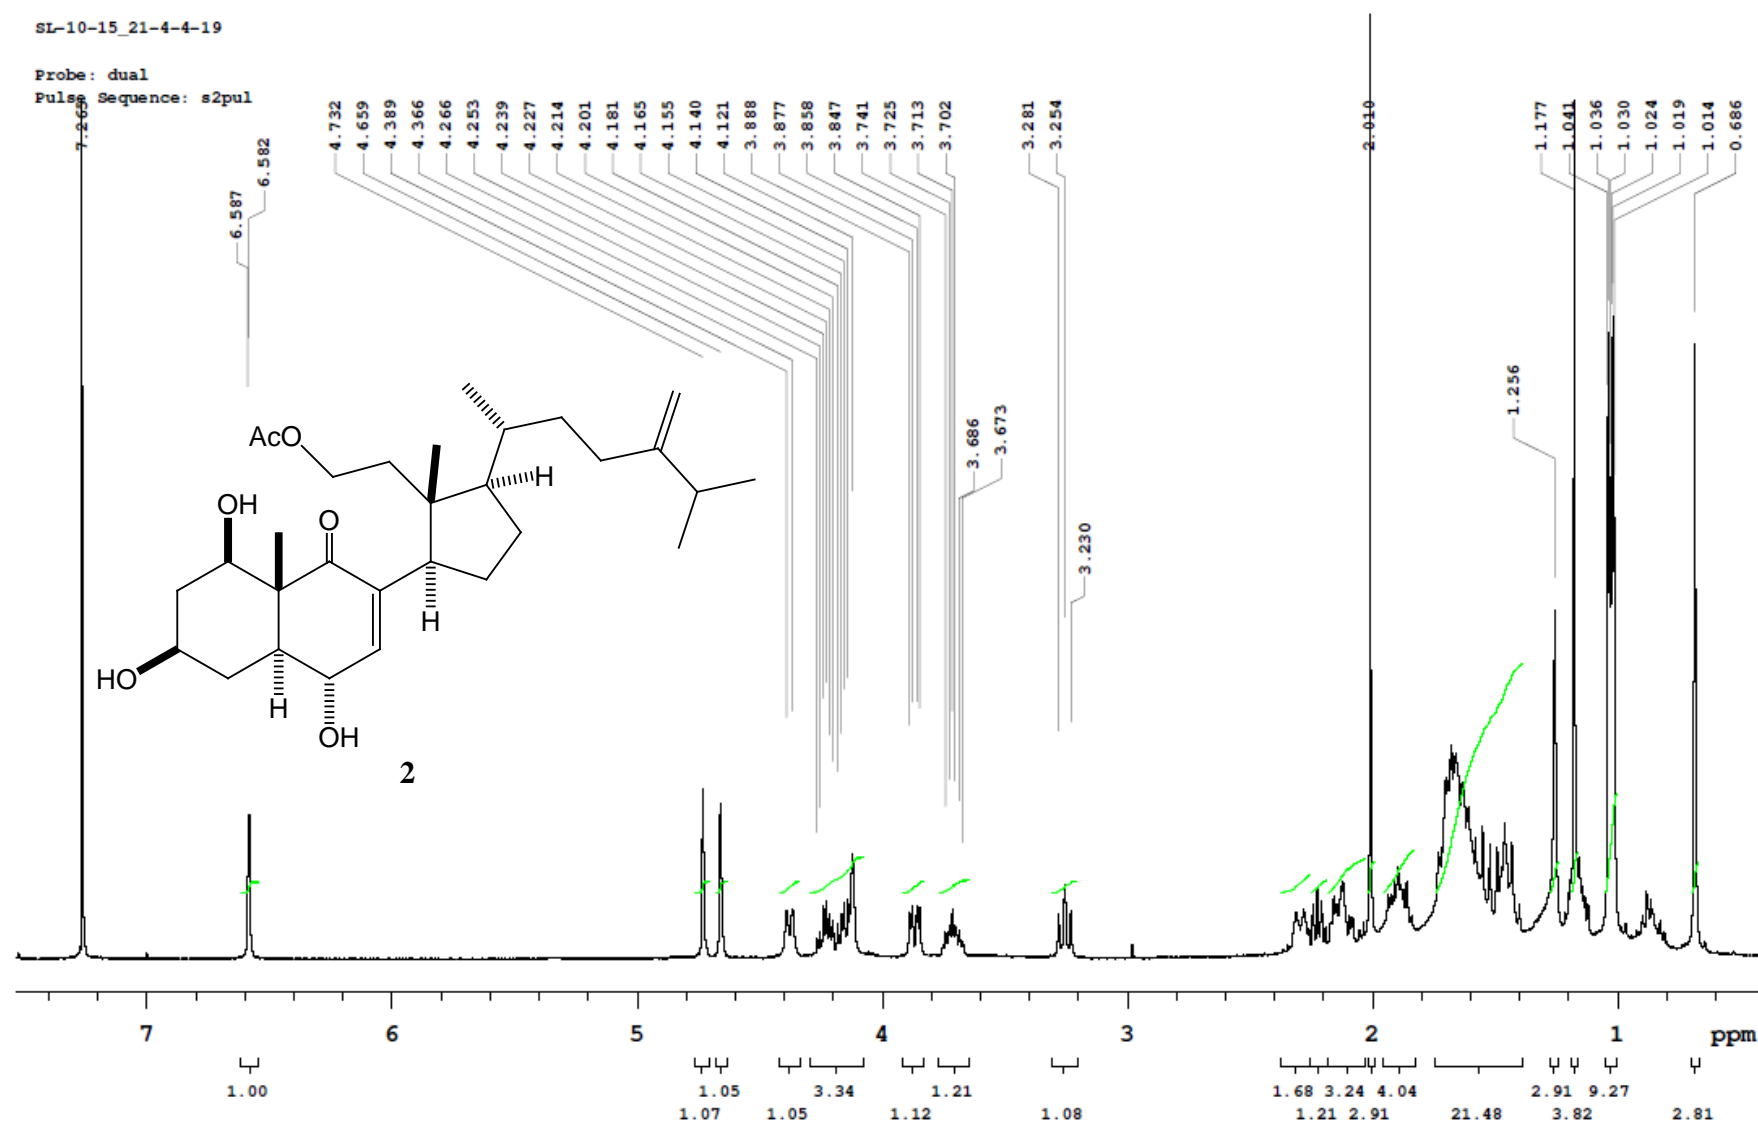

**Figure S9.**  $^{13}\text{C}$  NMR spectrum (100 MHz) of compound **2** in  $\text{CDCl}_3$ .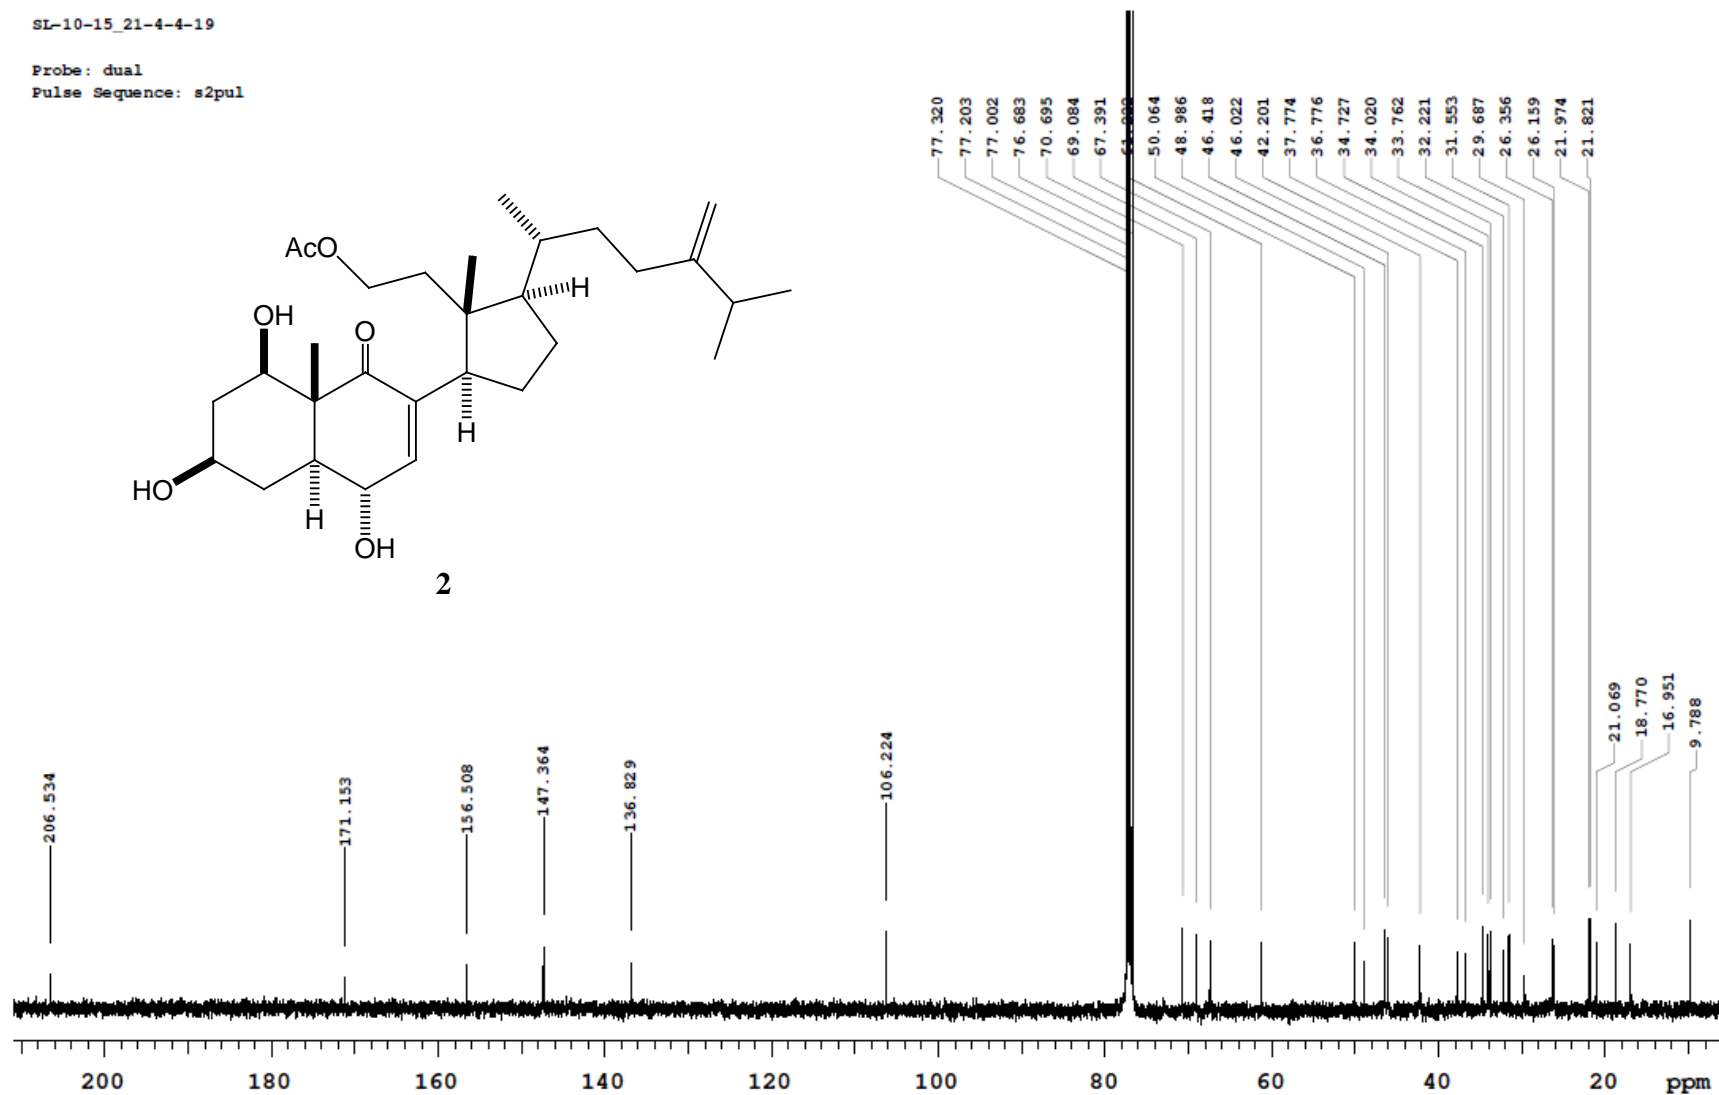

SL-10-15 21-4-4-19

Probe: dual

Pulse Sequence: gCOSY

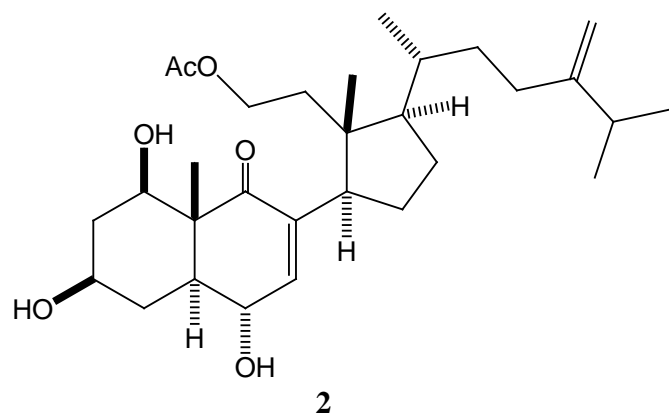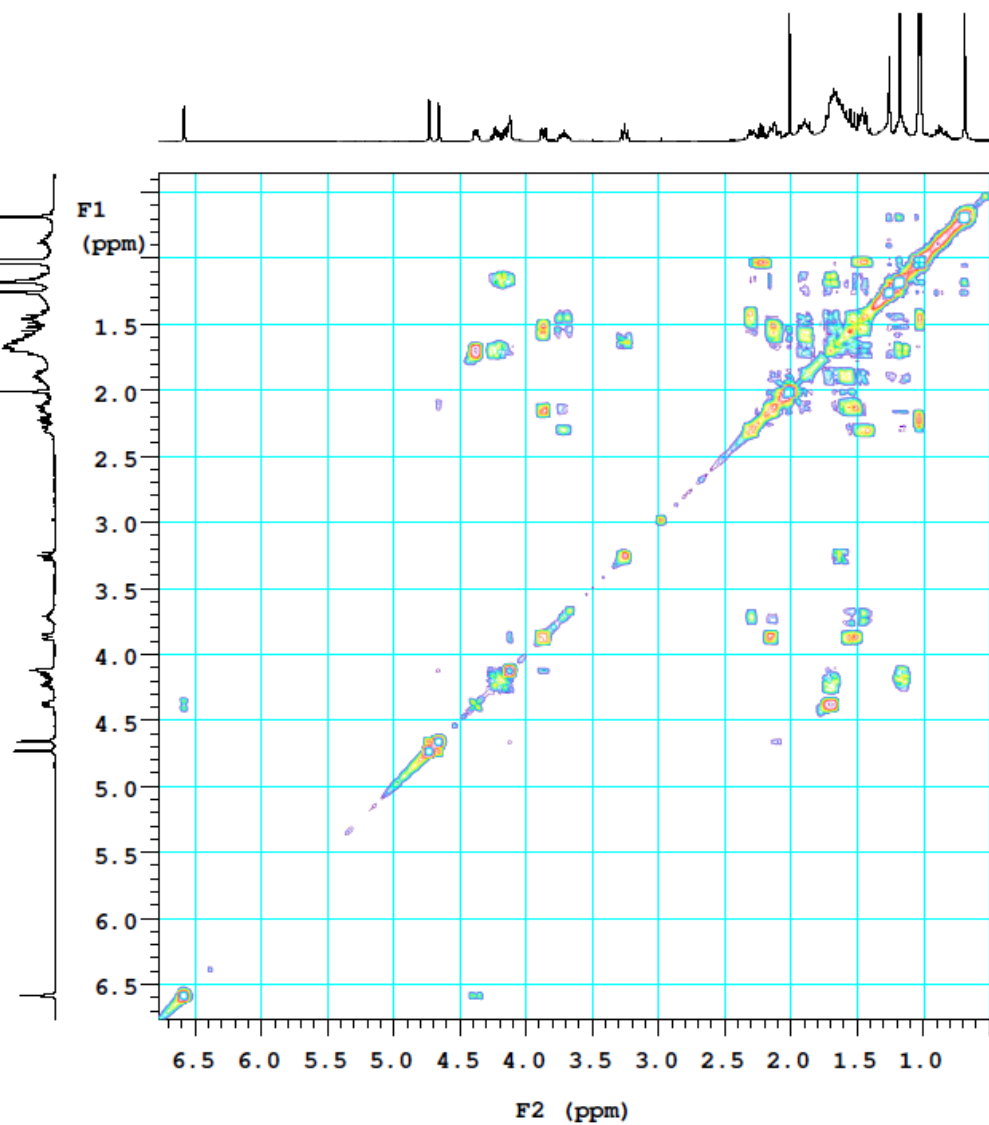

**Figure S11.** HSQC spectrum (400 MHz) of compound **2** in CDCl<sub>3</sub>.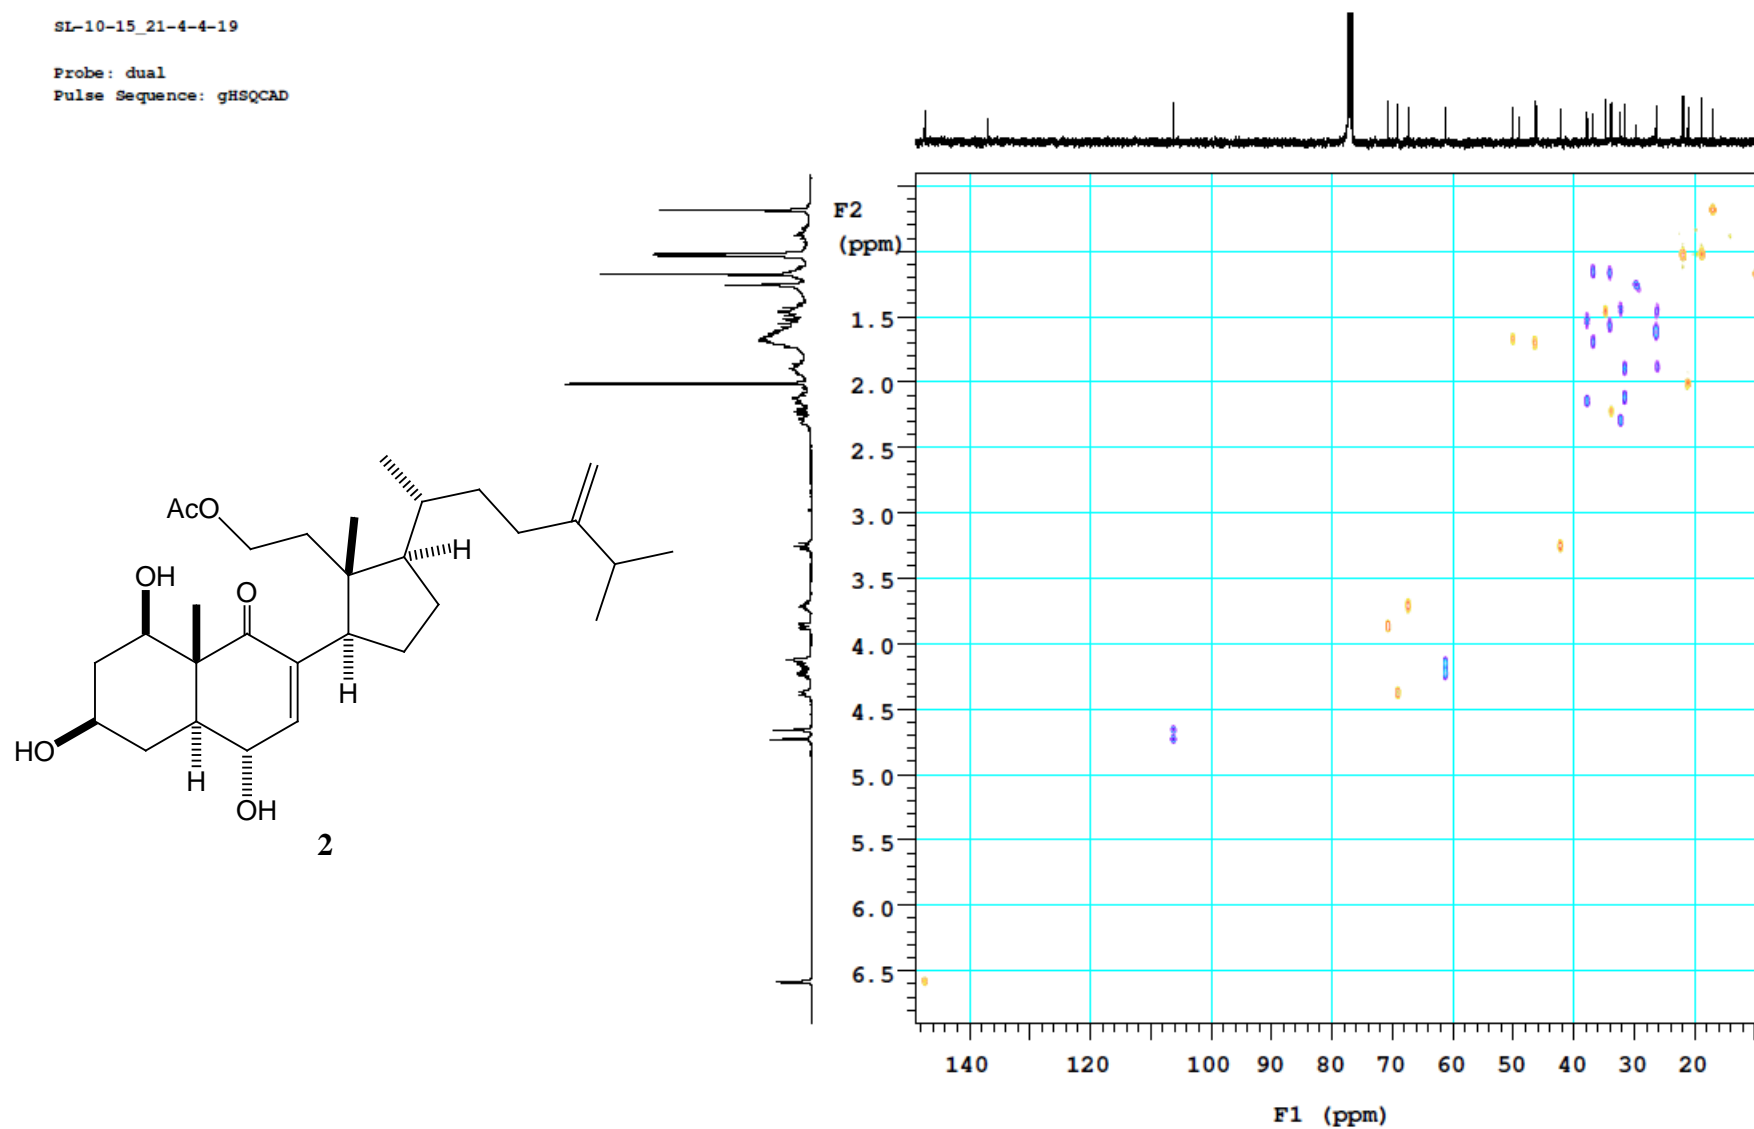

**Figure S12.** HMBC spectrum (400 MHz) of compound **2** in CDCl<sub>3</sub>.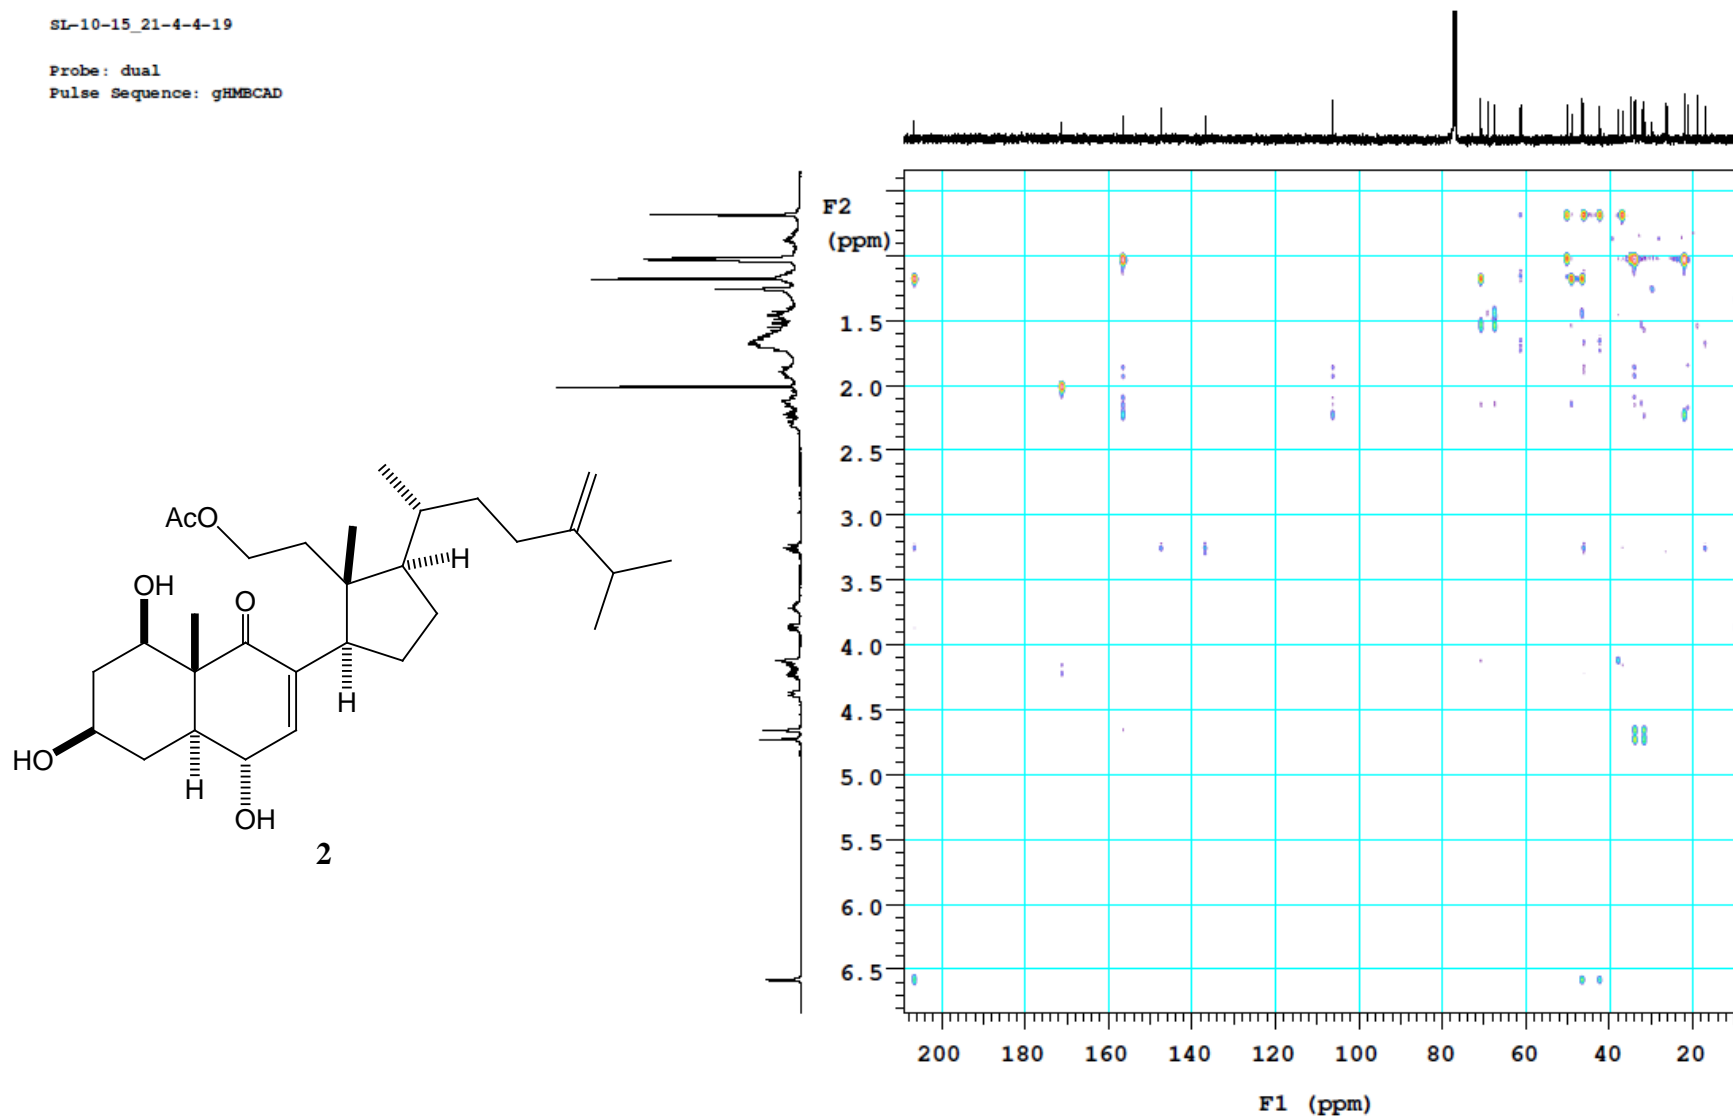

**Figure S13.** NOESY spectrum (400 MHz) of compound **2** in CDCl<sub>3</sub>.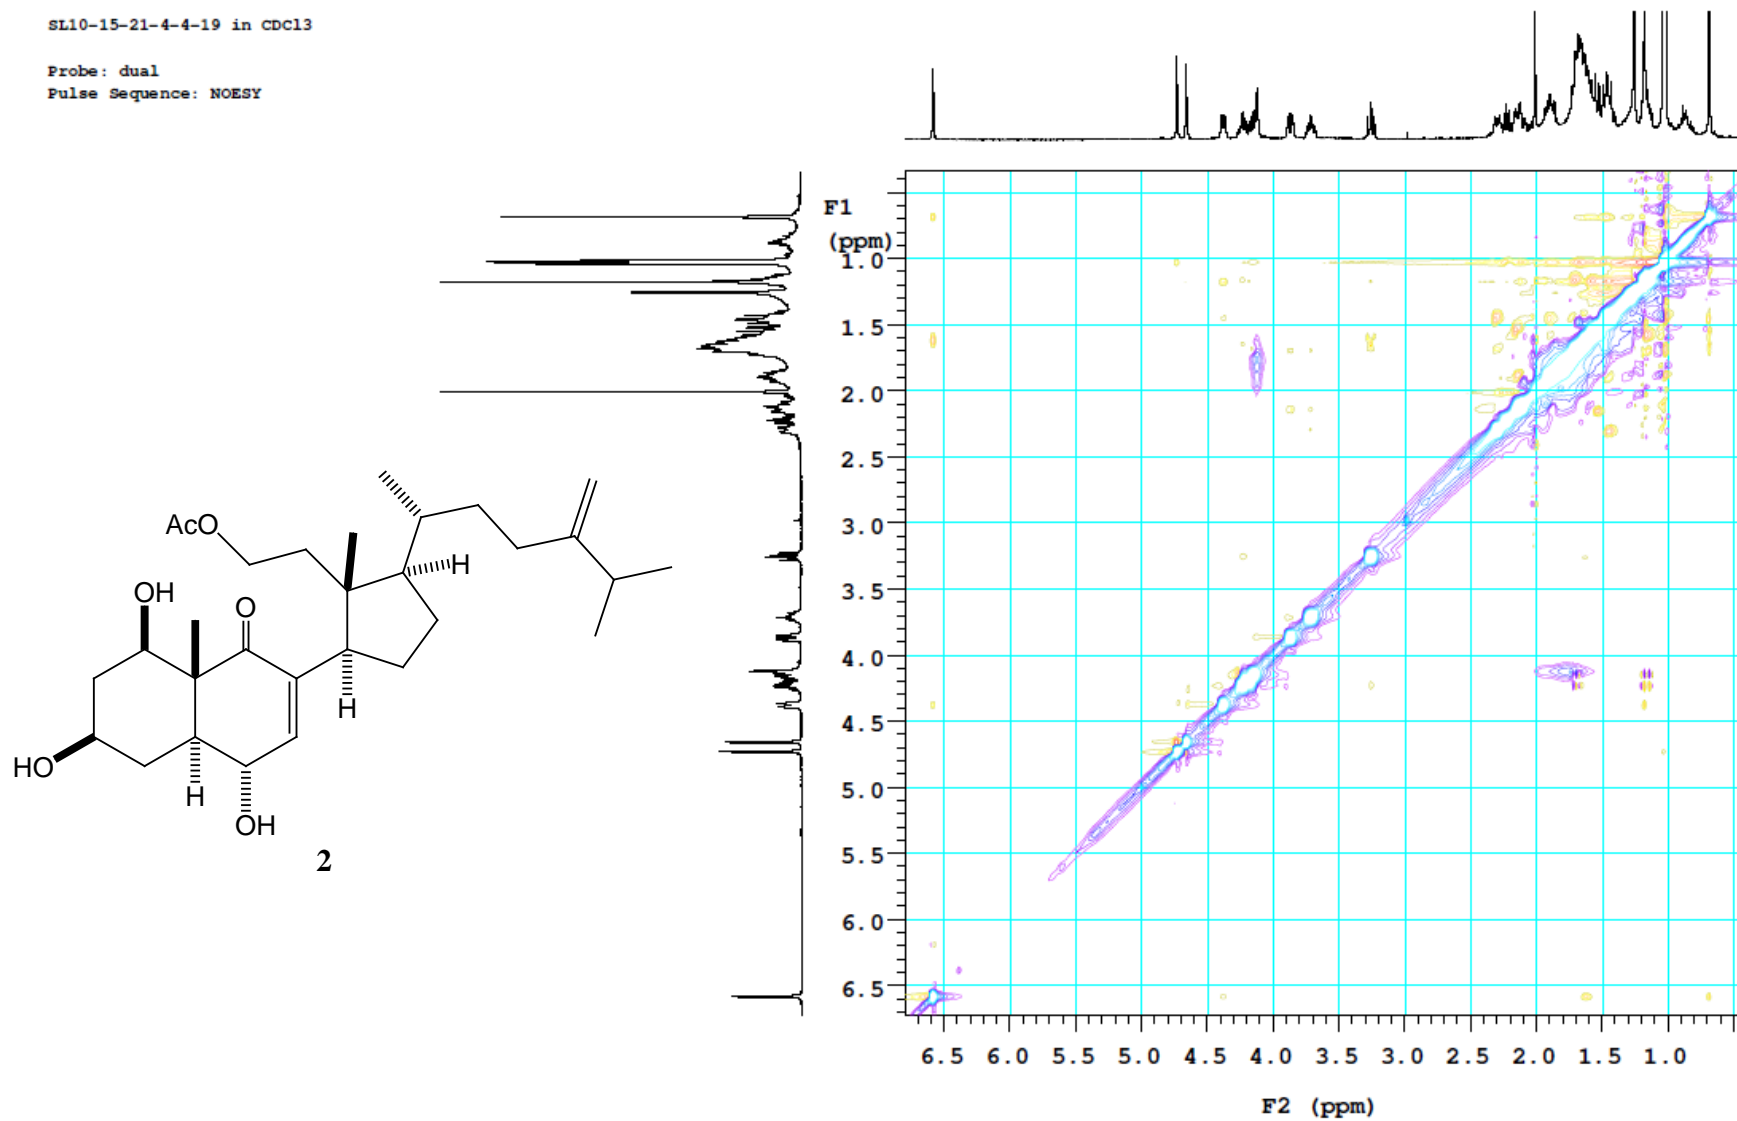

Supplement: Supplementary File 1 — Supplementary Materials (PDF, 610 KB) [file marinedrugs-11-03288-s001.pdf]
