# Supplementary material for: Secosteroids and Norcembranoids from the Soft Coral Sinularia nanolobata
Source: MDPI journal article supplement (doi:10.3390/md11093288), 2013-08-27
Supplement: s2 [file s2]

marinedrugs-11-03288-s001.mol
  corina  12171322003D 1   1.00000     0.00000 
CORINA 3.49 0023  12.04.2013
 39 41  0  0  0  0  0  0  0  0999 V2000
    5.7738   -2.9768    4.6676 C   0  0  0  0  0  0  0  0  0  0  0  0
    4.4584   -2.4333    5.2292 C   0  0  0  0  0  0  0  0  0  0  0  0
    4.0098   -1.2285    4.4001 C   0  0  0  0  0  0  0  0  0  0  0  0
    5.0784   -0.1359    4.4658 C   0  0  0  0  0  0  0  0  0  0  0  0
    6.3964   -0.6821    3.8974 C   0  0  0  0  0  0  0  0  0  0  0  0
    6.8439   -1.8853    4.7296 C   0  0  0  0  0  0  0  0  0  0  0  0
    4.6358    1.0621    3.6254 C   0  0  0  0  0  0  0  0  0  0  0  0
    5.7333    2.0785    3.5146 C   0  0  0  0  0  0  0  0  0  0  0  0
    7.0155    1.7857    3.6945 C   0  0  0  0  0  0  0  0  0  0  0  0
    7.4300    0.4188    4.0276 C   0  0  0  0  0  0  0  0  0  0  0  0
    8.0550    2.8678    3.5546 C   0  0  0  0  0  0  0  0  0  0  0  0
    8.6240    2.8705    2.1250 C   0  0  0  0  0  0  0  0  0  0  0  0
    7.4100    4.2518    3.7749 C   0  0  0  0  0  0  0  0  0  0  0  0
    7.0874    4.7524    2.3451 C   0  0  0  0  0  0  0  0  0  0  0  0
    8.3049    4.2561    1.5263 C   0  0  0  0  0  0  0  0  0  0  0  0
    7.0288    5.3377   -1.9417 C   0  0  0  0  0  0  0  0  0  0  0  0
    7.3949    5.4653   -0.4616 C   0  0  0  0  0  0  0  0  0  0  0  0
    7.9388    4.1285    0.0463 C   0  0  0  0  0  0  0  0  0  0  0  0
    8.2771    6.9321   -4.3672 C   0  0  0  0  0  0  0  0  0  0  0  0
    7.7464    7.5728   -3.0831 C   0  0  0  0  0  0  0  0  0  0  0  0
    6.6739    6.6957   -2.4902 C   0  0  0  0  0  0  0  0  0  0  0  0
    3.4580   -3.4519    5.1696 O   0  0  0  0  0  0  0  0  0  0  0  0
    6.2125   -1.0906    2.4345 C   0  0  0  0  0  0  0  0  0  0  0  0
    5.2257    0.1698    5.5016 H   0  0  0  0  0  0  0  0  0  0  0  0
    3.4954    1.6682    4.2369 O   0  0  0  0  0  0  0  0  0  0  0  0
    8.8572    2.7099    4.2755 H   0  0  0  0  0  0  0  0  0  0  0  0
    8.5609    0.1778    4.3950 O   0  0  0  0  0  0  0  0  0  0  0  0
    9.1844    3.7467   -0.7561 C   0  0  0  0  0  0  0  0  0  0  0  0
    5.4330    7.1139   -2.4517 C   0  0  0  0  0  0  0  0  0  0  0  0
    8.8910    7.7277   -2.0797 C   0  0  0  0  0  0  0  0  0  0  0  0
    7.9562    1.7738    1.2930 C   0  0  0  0  0  0  0  0  0  0  0  0
    9.1513    4.9309    1.6542 H   0  0  0  0  0  0  0  0  0  0  0  0
   10.1378    2.6520    2.1630 C   0  0  0  0  0  0  0  0  0  0  0  0
   10.4411    1.2921    2.7952 C   0  0  0  0  0  0  0  0  0  0  0  0
   11.8466    1.0416    2.7348 O   0  0  0  0  0  0  0  0  0  0  0  0
    6.2129    5.8276    0.2999 O   0  0  0  0  0  0  0  0  0  0  0  0
    6.7715    7.9527    0.0640 O   0  0  0  0  0  0  0  0  0  0  0  0
    6.0084    7.1355    0.5221 C   0  0  0  0  0  0  0  0  0  0  0  0
    4.8270    7.5846    1.3428 C   0  0  0  0  0  0  0  0  0  0  0  0
  1  2  1  0      
  2  3  1  0      
  3  4  1  0      
  4  5  1  0      
  5  6  1  0      
  6  1  1  0      
  4  7  1  0      
  7  8  1  0      
  8  9  2  0      
  9 10  1  0      
 10  5  1  0      
  9 11  1  0      
 11 12  1  0      
 11 13  1  0      
 13 14  1  0      
 14 15  1  0      
 15 12  1  0      
 16 17  1  0      
 17 18  1  0      
 18 15  1  0      
 19 20  1  0      
 20 21  1  0      
 21 16  1  0      
  2 22  1  0      
  5 23  1  0      
  4 24  1  0      
  7 25  1  0      
 11 26  1  0      
 10 27  2  0      
 18 28  1  0      
 21 29  2  0      
 20 30  1  0      
 12 31  1  0      
 15 32  1  0      
 12 33  1  0      
 33 34  1  0      
 34 35  1  0      
 17 36  1  0      
 36 38  1  0      
 37 38  2  0      
 38 39  1  0      
M  STY  1   1 SUP
M  SLB  1   1   1
M  SAL   1  4  36  37  38  39
M  SBL   1  1  38
M  SMT   1 OAc
M  SBV   1 38   -5.7865    8.9459
M  END
$$$$
