# Supplementary material for: Secosteroids and Norcembranoids from the Soft Coral Sinularia nanolobata
Source: MDPI journal article supplement (doi:10.3390/md11093288), 2013-08-27
Supplement: s3 [file s3]

marinedrugs-11-03288-s001.mol
  ChemDraw12021317182D

 39 41  0  0  0  0  0  0  0  0999 V2000
   -3.6929   -0.9710    0.0000 C   0  0  0  0  0  0  0  0  0  0  0  0
   -3.6929   -1.7960    0.0000 C   0  0  0  0  0  0  0  0  0  0  0  0
   -2.9784   -2.2085    0.0000 C   0  0  0  0  0  0  0  0  0  0  0  0
   -2.2639   -1.7960    0.0000 C   0  0  0  0  0  0  0  0  0  0  0  0
   -2.2639   -0.9710    0.0000 C   0  0  0  0  0  0  0  0  0  0  0  0
   -2.9784   -0.5585    0.0000 C   0  0  0  0  0  0  0  0  0  0  0  0
   -1.5495   -2.2085    0.0000 C   0  0  0  0  0  0  0  0  0  0  0  0
   -0.8350   -1.7960    0.0000 C   0  0  0  0  0  0  0  0  0  0  0  0
   -0.8350   -0.9710    0.0000 C   0  0  0  0  0  0  0  0  0  0  0  0
   -1.5495   -0.5585    0.0000 C   0  0  0  0  0  0  0  0  0  0  0  0
   -0.1205   -0.5585    0.0000 C   0  0  0  0  0  0  0  0  0  0  0  0
   -0.1205    0.2665    0.0000 C   0  0  0  0  0  0  0  0  0  0  0  0
    0.6641   -0.8135    0.0000 C   0  0  0  0  0  0  0  0  0  0  0  0
    1.1490   -0.1460    0.0000 C   0  0  0  0  0  0  0  0  0  0  0  0
    0.6641    0.5214    0.0000 C   0  0  0  0  0  0  0  0  0  0  0  0
    2.3051    0.6939    0.0000 C   0  0  0  0  0  0  0  0  0  0  0  0
    1.8201    1.3613    0.0000 C   0  0  0  0  0  0  0  0  0  0  0  0
    0.9997    1.2751    0.0000 C   0  0  0  0  0  0  0  0  0  0  0  0
    3.2749   -0.6410    0.0000 C   0  0  0  0  0  0  0  0  0  0  0  0
    3.6105    0.1127    0.0000 C   0  0  0  0  0  0  0  0  0  0  0  0
    3.1255    0.7801    0.0000 C   0  0  0  0  0  0  0  0  0  0  0  0
   -4.4074   -2.2085    0.0000 O   0  0  0  0  0  0  0  0  0  0  0  0
   -2.2639   -0.1460    0.0000 C   0  0  0  0  0  0  0  0  0  0  0  0
   -2.2639   -2.6210    0.0000 H   0  0  0  0  0  0  0  0  0  0  0  0
   -1.5495   -3.0335    0.0000 O   0  0  0  0  0  0  0  0  0  0  0  0
   -0.1205   -1.3835    0.0000 H   0  0  0  0  0  0  0  0  0  0  0  0
   -1.5632    0.0602    0.0000 O   0  0  0  0  0  0  0  0  0  0  0  0
    0.4163    1.8585    0.0000 C   0  0  0  0  0  0  0  0  0  0  0  0
    3.3391    1.5770    0.0000 C   0  0  0  0  0  0  0  0  0  0  0  0
    4.4074    0.3262    0.0000 C   0  0  0  0  0  0  0  0  0  0  0  0
   -0.0518    1.1052    0.0000 C   0  0  0  0  0  0  0  0  0  0  0  0
    1.5434    0.6251    0.0000 H   0  0  0  0  0  0  0  0  0  0  0  0
   -0.7039    0.8498    0.0000 C   0  0  0  0  0  0  0  0  0  0  0  0
   -1.5008    0.6363    0.0000 C   0  0  0  0  0  0  0  0  0  0  0  0
   -2.0841    1.2197    0.0000 O   0  0  0  0  0  0  0  0  0  0  0  0
    1.5283    1.6533    0.0000 O   0  0  0  0  0  0  0  0  0  0  0  0
    0.1480    2.0231    0.0000 O   0  0  0  0  0  0  0  0  0  0  0  0
    0.9449    2.2366    0.0000 C   0  0  0  0  0  0  0  0  0  0  0  0
    1.1584    3.0335    0.0000 C   0  0  0  0  0  0  0  0  0  0  0  0
  1  2  1  0      
  2  3  1  0      
  3  4  1  0      
  4  5  1  0      
  5  6  1  0      
  6  1  1  0      
  4  7  1  0      
  7  8  1  0      
  8  9  2  0      
  9 10  1  0      
 10  5  1  0      
  9 11  1  0      
 11 12  1  0      
 11 13  1  0      
 13 14  1  0      
 14 15  1  0      
 15 12  1  0      
 16 17  1  0      
 17 18  1  0      
 18 15  1  0      
 19 20  1  0      
 20 21  1  0      
 21 16  1  0      
  2 22  1  1      
  5 23  1  1      
  4 24  1  6      
  7 25  1  6      
 11 26  1  6      
 10 27  2  0      
 18 28  1  6      
 21 29  2  0      
 20 30  1  0      
 12 31  1  1      
 15 32  1  6      
 12 33  1  0      
 33 34  1  0      
 34 35  1  0      
 17 36  1  6      
 36 38  1  0      
 37 38  2  0      
 38 39  1  0      
M  STY  1   1 SUP
M  SLB  1   1   1
M  SAL   1  4  36  37  38  39
M  SBL   1  1  38
M  SMT   1 OAc
M  SBV   1 38   -5.7865    8.9459
M  END
