# Supplementary material for: Secosteroids and Norcembranoids from the Soft Coral Sinularia nanolobata
Source: MDPI journal article supplement (doi:10.3390/md11093288), 2013-08-27
Supplement: s4 [file s4]

marinedrugs-11-03288-s002.mol
  corina  12171322003D 1   1.00000     0.00000 
CORINA 3.49 0023  12.04.2013
 39 41  0  0  0  0  0  0  0  0999 V2000
    1.6031   -2.9389   -0.2474 C   0  0  0  0  0  0  0  0  0  0  0  0
    0.4084   -2.1860    0.3415 C   0  0  0  0  0  0  0  0  0  0  0  0
    0.5798   -0.6860    0.0949 C   0  0  0  0  0  0  0  0  0  0  0  0
    1.8655   -0.2008    0.7670 C   0  0  0  0  0  0  0  0  0  0  0  0
    3.0637   -0.9545    0.1712 C   0  0  0  0  0  0  0  0  0  0  0  0
    2.8908   -2.4538    0.4211 C   0  0  0  0  0  0  0  0  0  0  0  0
    2.0436    1.2954    0.5080 C   0  0  0  0  0  0  0  0  0  0  0  0
    3.3807    1.7716    0.9928 C   0  0  0  0  0  0  0  0  0  0  0  0
    4.4191    0.9639    1.1697 C   0  0  0  0  0  0  0  0  0  0  0  0
    4.3023   -0.4730    0.9001 C   0  0  0  0  0  0  0  0  0  0  0  0
    5.7306    1.5288    1.6516 C   0  0  0  0  0  0  0  0  0  0  0  0
    6.6622    1.7923    0.4556 C   0  0  0  0  0  0  0  0  0  0  0  0
    5.4989    2.8906    2.3382 C   0  0  0  0  0  0  0  0  0  0  0  0
    5.7712    3.9298    1.2224 C   0  0  0  0  0  0  0  0  0  0  0  0
    6.9643    3.3051    0.4572 C   0  0  0  0  0  0  0  0  0  0  0  0
    7.0007    5.9100   -2.3752 C   0  0  0  0  0  0  0  0  0  0  0  0
    7.0689    5.3701   -0.9453 C   0  0  0  0  0  0  0  0  0  0  0  0
    7.0219    3.8411   -0.9746 C   0  0  0  0  0  0  0  0  0  0  0  0
    5.1557    7.8286   -0.7966 C   0  0  0  0  0  0  0  0  0  0  0  0
    5.7796    8.2051   -2.1420 C   0  0  0  0  0  0  0  0  0  0  0  0
    7.0471    7.4160   -2.3463 C   0  0  0  0  0  0  0  0  0  0  0  0
   -0.7945   -2.6373   -0.2841 O   0  0  0  0  0  0  0  0  0  0  0  0
    3.1692   -0.6777   -1.3299 C   0  0  0  0  0  0  0  0  0  0  0  0
    1.8113   -0.3894    1.8392 H   0  0  0  0  0  0  0  0  0  0  0  0
    1.0141    2.0150    1.1895 O   0  0  0  0  0  0  0  0  0  0  0  0
    6.2027    0.8347    2.3469 H   0  0  0  0  0  0  0  0  0  0  0  0
    5.1670   -1.2494    1.2488 O   0  0  0  0  0  0  0  0  0  0  0  0
    8.2752    3.3055   -1.6697 C   0  0  0  0  0  0  0  0  0  0  0  0
    8.1892    8.0392   -2.4988 C   0  0  0  0  0  0  0  0  0  0  0  0
    4.7938    7.8872   -3.2680 C   0  0  0  0  0  0  0  0  0  0  0  0
    5.9654    1.3983   -0.8483 C   0  0  0  0  0  0  0  0  0  0  0  0
    7.8998    3.5068    0.9790 H   0  0  0  0  0  0  0  0  0  0  0  0
    4.0064   -3.1594   -0.1263 O   0  0  0  0  0  0  0  0  0  0  0  0
    7.9602    0.9985    0.6175 C   0  0  0  0  0  0  0  0  0  0  0  0
    7.6321   -0.4861    0.7888 C   0  0  0  0  0  0  0  0  0  0  0  0
    8.8644   -1.2534    0.8217 O   0  0  0  0  0  0  0  0  0  0  0  0
    7.6577   -3.0886    1.0651 O   0  0  0  0  0  0  0  0  0  0  0  0
    8.7507   -2.5828    0.9679 C   0  0  0  0  0  0  0  0  0  0  0  0
    9.9862   -3.4445    1.0108 C   0  0  0  0  0  0  0  0  0  0  0  0
  1  2  1  0      
  2  3  1  0      
  3  4  1  0      
  4  5  1  0      
  5  6  1  0      
  6  1  1  0      
  4  7  1  0      
  7  8  1  0      
  8  9  2  0      
  9 10  1  0      
 10  5  1  0      
  9 11  1  0      
 11 12  1  0      
 11 13  1  0      
 13 14  1  0      
 14 15  1  0      
 15 12  1  0      
 16 17  1  0      
 17 18  1  0      
 18 15  1  0      
 19 20  1  0      
 20 21  1  0      
 21 16  1  0      
  2 22  1  0      
  5 23  1  0      
  4 24  1  0      
  7 25  1  0      
 11 26  1  0      
 10 27  2  0      
 18 28  1  0      
 21 29  2  0      
 20 30  1  0      
 12 31  1  0      
 15 32  1  0      
  6 33  1  0      
 12 34  1  0      
 34 35  1  0      
 35 36  1  0      
 36 38  1  0      
 37 38  2  0      
 38 39  1  0      
M  STY  1   1 SUP
M  SLB  1   1   1
M  SAL   1  4  36  37  38  39
M  SBL   1  1  38
M  SMT   1 OAc
M  SBV   1 38   -6.1853    9.2554
M  END
$$$$
