# Supplementary material for: Secosteroids and Norcembranoids from the Soft Coral Sinularia nanolobata
Source: MDPI journal article supplement (doi:10.3390/md11093288), 2013-08-27
Supplement: s5 [file s5]

marinedrugs-11-03288-s002.mol
  ChemDraw12021317182D

 39 41  0  0  0  0  0  0  0  0999 V2000
   -3.6929   -0.5555    0.0000 C   0  0  0  0  0  0  0  0  0  0  0  0
   -3.6929   -1.3805    0.0000 C   0  0  0  0  0  0  0  0  0  0  0  0
   -2.9784   -1.7930    0.0000 C   0  0  0  0  0  0  0  0  0  0  0  0
   -2.2639   -1.3805    0.0000 C   0  0  0  0  0  0  0  0  0  0  0  0
   -2.2639   -0.5555    0.0000 C   0  0  0  0  0  0  0  0  0  0  0  0
   -2.9784   -0.1430    0.0000 C   0  0  0  0  0  0  0  0  0  0  0  0
   -1.5495   -1.7930    0.0000 C   0  0  0  0  0  0  0  0  0  0  0  0
   -0.8350   -1.3805    0.0000 C   0  0  0  0  0  0  0  0  0  0  0  0
   -0.8350   -0.5555    0.0000 C   0  0  0  0  0  0  0  0  0  0  0  0
   -1.5495   -0.1430    0.0000 C   0  0  0  0  0  0  0  0  0  0  0  0
   -0.1205   -0.1430    0.0000 C   0  0  0  0  0  0  0  0  0  0  0  0
   -0.1205    0.6820    0.0000 C   0  0  0  0  0  0  0  0  0  0  0  0
    0.6641   -0.3980    0.0000 C   0  0  0  0  0  0  0  0  0  0  0  0
    1.1490    0.2695    0.0000 C   0  0  0  0  0  0  0  0  0  0  0  0
    0.6641    0.9369    0.0000 C   0  0  0  0  0  0  0  0  0  0  0  0
    2.3051    1.1094    0.0000 C   0  0  0  0  0  0  0  0  0  0  0  0
    1.8201    1.7768    0.0000 C   0  0  0  0  0  0  0  0  0  0  0  0
    0.9997    1.6906    0.0000 C   0  0  0  0  0  0  0  0  0  0  0  0
    3.2749   -0.2255    0.0000 C   0  0  0  0  0  0  0  0  0  0  0  0
    3.6105    0.5282    0.0000 C   0  0  0  0  0  0  0  0  0  0  0  0
    3.1255    1.1956    0.0000 C   0  0  0  0  0  0  0  0  0  0  0  0
   -4.4074   -1.7930    0.0000 O   0  0  0  0  0  0  0  0  0  0  0  0
   -2.2639    0.2695    0.0000 C   0  0  0  0  0  0  0  0  0  0  0  0
   -2.2639   -2.2055    0.0000 H   0  0  0  0  0  0  0  0  0  0  0  0
   -1.5495   -2.6180    0.0000 O   0  0  0  0  0  0  0  0  0  0  0  0
   -0.1205   -0.9680    0.0000 H   0  0  0  0  0  0  0  0  0  0  0  0
   -1.5632    0.4757    0.0000 O   0  0  0  0  0  0  0  0  0  0  0  0
    0.4163    2.2739    0.0000 C   0  0  0  0  0  0  0  0  0  0  0  0
    3.3391    1.9925    0.0000 C   0  0  0  0  0  0  0  0  0  0  0  0
    4.4074    0.7417    0.0000 C   0  0  0  0  0  0  0  0  0  0  0  0
   -0.0518    1.5207    0.0000 C   0  0  0  0  0  0  0  0  0  0  0  0
    1.5710    1.0679    0.0000 H   0  0  0  0  0  0  0  0  0  0  0  0
   -2.9784    0.6820    0.0000 O   0  0  0  0  0  0  0  0  0  0  0  0
   -0.7039    1.2653    0.0000 C   0  0  0  0  0  0  0  0  0  0  0  0
   -1.5008    1.0518    0.0000 C   0  0  0  0  0  0  0  0  0  0  0  0
   -2.1914    1.2378    0.0000 O   0  0  0  0  0  0  0  0  0  0  0  0
   -3.5717    1.6076    0.0000 O   0  0  0  0  0  0  0  0  0  0  0  0
   -2.7748    1.8211    0.0000 C   0  0  0  0  0  0  0  0  0  0  0  0
   -2.5613    2.6180    0.0000 C   0  0  0  0  0  0  0  0  0  0  0  0
  1  2  1  0      
  2  3  1  0      
  3  4  1  0      
  4  5  1  0      
  5  6  1  0      
  6  1  1  0      
  4  7  1  0      
  7  8  1  0      
  8  9  2  0      
  9 10  1  0      
 10  5  1  0      
  9 11  1  0      
 11 12  1  0      
 11 13  1  0      
 13 14  1  0      
 14 15  1  0      
 15 12  1  0      
 16 17  1  0      
 17 18  1  0      
 18 15  1  0      
 19 20  1  0      
 20 21  1  0      
 21 16  1  0      
  2 22  1  1      
  5 23  1  1      
  4 24  1  6      
  7 25  1  6      
 11 26  1  6      
 10 27  2  0      
 18 28  1  6      
 21 29  2  0      
 20 30  1  0      
 12 31  1  1      
 15 32  1  6      
  6 33  1  1      
 12 34  1  0      
 34 35  1  0      
 35 36  1  0      
 36 38  1  0      
 37 38  2  0      
 38 39  1  0      
M  STY  1   1 SUP
M  SLB  1   1   1
M  SAL   1  4  36  37  38  39
M  SBL   1  1  38
M  SMT   1 OAc
M  SBV   1 38   -6.1853    9.2554
M  END
