# Supplementary material for: Secosteroids and Norcembranoids from the Soft Coral Sinularia nanolobata
Source: MDPI journal article supplement (doi:10.3390/md11093288), 2013-08-27
Supplement: s9 [file s9]

marinedrugs-11-03288-s004.mol
  ChemDraw12021317192D

 26 28  0  0  0  0  0  0  0  0999 V2000
   -2.3909    1.1332    0.0000 C   0  0  0  0  0  0  0  0  0  0  0  0
   -2.1451    0.3457    0.0000 C   0  0  0  0  0  0  0  0  0  0  0  0
   -1.3201    0.3361    0.0000 O   0  0  0  0  0  0  0  0  0  0  0  0
   -1.0561    1.1177    0.0000 C   0  0  0  0  0  0  0  0  0  0  0  0
   -1.7178    1.6104    0.0000 C   0  0  0  0  0  0  0  0  0  0  0  0
   -2.4091   -0.4359    0.0000 C   0  0  0  0  0  0  0  0  0  0  0  0
   -1.7473   -0.9286    0.0000 C   0  0  0  0  0  0  0  0  0  0  0  0
   -1.0743   -0.4359    0.0000 C   0  0  0  0  0  0  0  0  0  0  0  0
   -1.4868   -1.7209    0.0000 O   0  0  0  0  0  0  0  0  0  0  0  0
   -0.6527   -1.7209    0.0000 C   0  0  0  0  0  0  0  0  0  0  0  0
   -0.3978   -0.9286    0.0000 C   0  0  0  0  0  0  0  0  0  0  0  0
   -1.7178    2.4354    0.0000 O   0  0  0  0  0  0  0  0  0  0  0  0
   -2.9701    0.3457    0.0000 C   0  0  0  0  0  0  0  0  0  0  0  0
   -0.2402   -2.4354    0.0000 O   0  0  0  0  0  0  0  0  0  0  0  0
   -0.2592    1.3312    0.0000 C   0  0  0  0  0  0  0  0  0  0  0  0
    0.3242    0.7479    0.0000 C   0  0  0  0  0  0  0  0  0  0  0  0
    1.1492    0.7479    0.0000 C   0  0  0  0  0  0  0  0  0  0  0  0
    0.3167   -0.5161    0.0000 C   0  0  0  0  0  0  0  0  0  0  0  0
    1.1417   -0.5161    0.0000 C   0  0  0  0  0  0  0  0  0  0  0  0
   -0.0883    0.0334    0.0000 O   0  0  0  0  0  0  0  0  0  0  0  0
   -0.8425    1.9146    0.0000 H   0  0  0  0  0  0  0  0  0  0  0  0
    1.7326    0.1645    0.0000 C   0  0  0  0  0  0  0  0  0  0  0  0
    2.5576    0.1645    0.0000 C   0  0  0  0  0  0  0  0  0  0  0  0
    2.9701    0.8790    0.0000 C   0  0  0  0  0  0  0  0  0  0  0  0
    2.9701   -0.5500    0.0000 C   0  0  0  0  0  0  0  0  0  0  0  0
   -0.6618    0.2786    0.0000 O   0  0  0  0  0  0  0  0  0  0  0  0
  1  2  1  0      
  2  3  1  0      
  3  4  1  0      
  4  5  1  0      
  5  1  1  0      
  2  6  1  0      
  6  7  1  0      
  7  8  1  0      
  9 10  1  0      
 10 11  1  0      
 11  8  1  0      
  5 12  2  0      
  2 13  1  1      
  7  9  1  1      
 10 14  2  0      
  4 15  1  0      
 15 16  1  0      
 16 17  1  0      
 11 18  2  0      
 18 19  1  0      
 16 20  2  0      
 17 22  1  0      
 22 19  1  0      
 22 23  1  6      
 23 24  1  0      
 23 25  2  0      
  8 26  1  6      
  4 21  1  6      
M  END
