# Supplementary material for: Secosteroids and Norcembranoids from the Soft Coral Sinularia nanolobata
Source: MDPI journal article supplement (doi:10.3390/md11093288), 2013-08-27
Supplement: s10 [file s10]

marinedrugs-11-03288-s005.mol
  corina  12171322023D 1   1.00000     0.00000 
CORINA 3.49 0023  12.04.2013
 34 36  0  0  0  0  0  0  0  0999 V2000
    1.5965   -2.9327   -0.2498 C   0  0  0  0  0  0  0  0  0  0  0  0
    0.4037   -2.1820    0.3458 C   0  0  0  0  0  0  0  0  0  0  0  0
    0.5747   -0.6810    0.1047 C   0  0  0  0  0  0  0  0  0  0  0  0
    1.8626   -0.1988    0.7748 C   0  0  0  0  0  0  0  0  0  0  0  0
    3.0587   -0.9503    0.1723 C   0  0  0  0  0  0  0  0  0  0  0  0
    2.8863   -2.4506    0.4167 C   0  0  0  0  0  0  0  0  0  0  0  0
    2.0401    1.2984    0.5213 C   0  0  0  0  0  0  0  0  0  0  0  0
    3.3788    1.7724    1.0039 C   0  0  0  0  0  0  0  0  0  0  0  0
    4.4176    0.9638    1.1743 C   0  0  0  0  0  0  0  0  0  0  0  0
    4.2997   -0.4720    0.8993 C   0  0  0  0  0  0  0  0  0  0  0  0
    5.7307    1.5265    1.6544 C   0  0  0  0  0  0  0  0  0  0  0  0
    6.6599    1.7915    0.4569 C   0  0  0  0  0  0  0  0  0  0  0  0
    5.5019    2.8872    2.3442 C   0  0  0  0  0  0  0  0  0  0  0  0
    5.7726    3.9283    1.2298 C   0  0  0  0  0  0  0  0  0  0  0  0
    6.9634    3.3040    0.4608 C   0  0  0  0  0  0  0  0  0  0  0  0
    6.9942    5.9144   -2.3667 C   0  0  0  0  0  0  0  0  0  0  0  0
    7.0650    5.3718   -0.9379 C   0  0  0  0  0  0  0  0  0  0  0  0
    7.0183    3.8428   -0.9701 C   0  0  0  0  0  0  0  0  0  0  0  0
    7.1420    9.5061   -3.7406 C   0  0  0  0  0  0  0  0  0  0  0  0
    6.9701    7.9860   -3.7632 C   0  0  0  0  0  0  0  0  0  0  0  0
    7.0409    7.4433   -2.3345 C   0  0  0  0  0  0  0  0  0  0  0  0
   -0.8012   -2.6306   -0.2779 O   0  0  0  0  0  0  0  0  0  0  0  0
    3.1596   -0.6676   -1.3280 C   0  0  0  0  0  0  0  0  0  0  0  0
    1.8116   -0.3917    1.8464 H   0  0  0  0  0  0  0  0  0  0  0  0
    1.0129    2.0154    1.2088 O   0  0  0  0  0  0  0  0  0  0  0  0
    6.2037    0.8306    2.3473 H   0  0  0  0  0  0  0  0  0  0  0  0
    5.1653   -1.2500    1.2422 O   0  0  0  0  0  0  0  0  0  0  0  0
    8.2706    3.3089   -1.6684 C   0  0  0  0  0  0  0  0  0  0  0  0
    5.6123    7.6353   -4.3752 C   0  0  0  0  0  0  0  0  0  0  0  0
    5.9599    1.4007   -0.8463 C   0  0  0  0  0  0  0  0  0  0  0  0
    7.9002    3.5037    0.9809 H   0  0  0  0  0  0  0  0  0  0  0  0
    7.9575    0.9962    0.6143 C   0  0  0  0  0  0  0  0  0  0  0  0
    7.6283   -0.4882    0.7853 C   0  0  0  0  0  0  0  0  0  0  0  0
    8.8404   -1.2445    0.8151 O   0  0  0  0  0  0  0  0  0  0  0  0
  1  2  1  0      
  2  3  1  0      
  3  4  1  0      
  4  5  1  0      
  5  6  1  0      
  6  1  1  0      
  4  7  1  0      
  7  8  1  0      
  8  9  2  0      
  9 10  1  0      
 10  5  1  0      
  9 11  1  0      
 11 12  1  0      
 11 13  1  0      
 13 14  1  0      
 14 15  1  0      
 15 12  1  0      
 16 17  1  0      
 17 18  1  0      
 18 15  1  0      
 19 20  1  0      
 20 21  1  0      
 21 16  1  0      
  2 22  1  0      
  5 23  1  0      
  4 24  1  0      
  7 25  1  0      
 11 26  1  0      
 10 27  2  0      
 18 28  1  0      
 20 29  1  0      
 12 30  1  0      
 15 31  1  0      
 12 32  1  0      
 32 33  1  0      
 33 34  1  0      
M  END
$$$$
