# Supplementary material for: Secosteroids and Norcembranoids from the Soft Coral Sinularia nanolobata
Source: MDPI journal article supplement (doi:10.3390/md11093288), 2013-08-27
Supplement: s11 [file s11]

marinedrugs-11-03288-s005.mol
  ChemDraw12021317192D

 34 36  0  0  0  0  0  0  0  0999 V2000
   -3.6929   -0.3835    0.0000 C   0  0  0  0  0  0  0  0  0  0  0  0
   -3.6929   -1.2085    0.0000 C   0  0  0  0  0  0  0  0  0  0  0  0
   -2.9784   -1.6210    0.0000 C   0  0  0  0  0  0  0  0  0  0  0  0
   -2.2639   -1.2085    0.0000 C   0  0  0  0  0  0  0  0  0  0  0  0
   -2.2639   -0.3835    0.0000 C   0  0  0  0  0  0  0  0  0  0  0  0
   -2.9784    0.0290    0.0000 C   0  0  0  0  0  0  0  0  0  0  0  0
   -1.5495   -1.6210    0.0000 C   0  0  0  0  0  0  0  0  0  0  0  0
   -0.8350   -1.2085    0.0000 C   0  0  0  0  0  0  0  0  0  0  0  0
   -0.8350   -0.3835    0.0000 C   0  0  0  0  0  0  0  0  0  0  0  0
   -1.5495    0.0290    0.0000 C   0  0  0  0  0  0  0  0  0  0  0  0
   -0.1205    0.0290    0.0000 C   0  0  0  0  0  0  0  0  0  0  0  0
   -0.1205    0.8540    0.0000 C   0  0  0  0  0  0  0  0  0  0  0  0
    0.6641   -0.2259    0.0000 C   0  0  0  0  0  0  0  0  0  0  0  0
    1.1490    0.4415    0.0000 C   0  0  0  0  0  0  0  0  0  0  0  0
    0.6641    1.1090    0.0000 C   0  0  0  0  0  0  0  0  0  0  0  0
    2.3051    1.2814    0.0000 C   0  0  0  0  0  0  0  0  0  0  0  0
    1.8201    1.9489    0.0000 C   0  0  0  0  0  0  0  0  0  0  0  0
    0.9997    1.8626    0.0000 C   0  0  0  0  0  0  0  0  0  0  0  0
    3.2749   -0.0535    0.0000 C   0  0  0  0  0  0  0  0  0  0  0  0
    3.6105    0.7002    0.0000 C   0  0  0  0  0  0  0  0  0  0  0  0
    3.1255    1.3677    0.0000 C   0  0  0  0  0  0  0  0  0  0  0  0
   -4.4074   -1.6210    0.0000 O   0  0  0  0  0  0  0  0  0  0  0  0
   -2.2639    0.4415    0.0000 C   0  0  0  0  0  0  0  0  0  0  0  0
   -2.2639   -2.0335    0.0000 H   0  0  0  0  0  0  0  0  0  0  0  0
   -1.5495   -2.4460    0.0000 O   0  0  0  0  0  0  0  0  0  0  0  0
   -0.1205   -0.7960    0.0000 H   0  0  0  0  0  0  0  0  0  0  0  0
   -1.5632    0.6478    0.0000 O   0  0  0  0  0  0  0  0  0  0  0  0
    0.4163    2.4460    0.0000 C   0  0  0  0  0  0  0  0  0  0  0  0
    4.4074    0.9137    0.0000 C   0  0  0  0  0  0  0  0  0  0  0  0
   -0.0518    1.6928    0.0000 C   0  0  0  0  0  0  0  0  0  0  0  0
    1.5710    1.2400    0.0000 H   0  0  0  0  0  0  0  0  0  0  0  0
   -0.7039    1.4374    0.0000 C   0  0  0  0  0  0  0  0  0  0  0  0
   -1.5008    1.2238    0.0000 C   0  0  0  0  0  0  0  0  0  0  0  0
   -2.0841    1.8072    0.0000 O   0  0  0  0  0  0  0  0  0  0  0  0
  1  2  1  0      
  2  3  1  0      
  3  4  1  0      
  4  5  1  0      
  5  6  1  0      
  6  1  1  0      
  4  7  1  0      
  7  8  1  0      
  8  9  2  0      
  9 10  1  0      
 10  5  1  0      
  9 11  1  0      
 11 12  1  0      
 11 13  1  0      
 13 14  1  0      
 14 15  1  0      
 15 12  1  0      
 16 17  1  0      
 17 18  1  0      
 18 15  1  0      
 19 20  1  0      
 20 21  1  0      
 21 16  1  0      
  2 22  1  1      
  5 23  1  1      
  4 24  1  6      
  7 25  1  6      
 11 26  1  6      
 10 27  2  0      
 18 28  1  6      
 20 29  1  0      
 12 30  1  1      
 15 31  1  6      
 12 32  1  0      
 32 33  1  0      
 33 34  1  0      
M  END
