# Supplementary material for: Secosteroids and Norcembranoids from the Soft Coral Sinularia nanolobata
Source: MDPI journal article supplement (doi:10.3390/md11093288), 2013-08-27
Supplement: s12 [file s12]

marinedrugs-11-03288-s006.mol
  corina  12171322023D 1   1.00000     0.00000 
CORINA 3.49 0023  12.04.2013
 33 36  0  0  0  0  0  0  0  0999 V2000
    4.8177   -1.3881    4.2485 C   0  0  0  0  0  0  0  0  0  0  0  0
    3.8095   -0.5546    5.0406 C   0  0  0  0  0  0  0  0  0  0  0  0
    2.5015   -0.4372    4.2506 C   0  0  0  0  0  0  0  0  0  0  0  0
    2.8093    0.1415    2.8700 C   0  0  0  0  0  0  0  0  0  0  0  0
    3.8805   -0.6154    2.0738 C   0  0  0  0  0  0  0  0  0  0  0  0
    5.1510   -0.6839    2.9291 C   0  0  0  0  0  0  0  0  0  0  0  0
    2.7409    1.6602    2.7057 C   0  0  0  0  0  0  0  0  0  0  0  0
    3.7577    2.3138    1.8121 C   0  0  0  0  0  0  0  0  0  0  0  0
    4.4345    1.5945    0.9106 C   0  0  0  0  0  0  0  0  0  0  0  0
    4.1626    0.1553    0.8050 C   0  0  0  0  0  0  0  0  0  0  0  0
    5.4573    2.2493    0.0184 C   0  0  0  0  0  0  0  0  0  0  0  0
    4.7635    3.2135   -0.9597 C   0  0  0  0  0  0  0  0  0  0  0  0
    6.4274    3.1010    0.8630 C   0  0  0  0  0  0  0  0  0  0  0  0
    5.8413    4.5327    0.7864 C   0  0  0  0  0  0  0  0  0  0  0  0
    5.3361    4.6174   -0.6754 C   0  0  0  0  0  0  0  0  0  0  0  0
    3.6228    8.0391   -0.2674 C   0  0  0  0  0  0  0  0  0  0  0  0
    4.7559    7.0110   -0.2554 C   0  0  0  0  0  0  0  0  0  0  0  0
    4.2410    5.6783   -0.8028 C   0  0  0  0  0  0  0  0  0  0  0  0
    3.5490   11.7639    0.6973 C   0  0  0  0  0  0  0  0  0  0  0  0
    3.0046   10.3999    0.2681 C   0  0  0  0  0  0  0  0  0  0  0  0
    4.1376    9.3718    0.2801 C   0  0  0  0  0  0  0  0  0  0  0  0
    3.5516   -1.1871    6.2957 O   0  0  0  0  0  0  0  0  0  0  0  0
    3.3913   -2.0280    1.7480 C   0  0  0  0  0  0  0  0  0  0  0  0
    6.0105    1.4903   -0.5348 H   0  0  0  0  0  0  0  0  0  0  0  0
    4.1648   -0.4007   -0.2734 O   0  0  0  0  0  0  0  0  0  0  0  0
    3.8610    5.8446   -2.2755 C   0  0  0  0  0  0  0  0  0  0  0  0
    1.9068    9.9605    1.2390 C   0  0  0  0  0  0  0  0  0  0  0  0
    3.2524    3.2054   -0.7202 C   0  0  0  0  0  0  0  0  0  0  0  0
    6.1618    4.8369   -1.3522 H   0  0  0  0  0  0  0  0  0  0  0  0
    5.0682    2.8055   -2.4025 C   0  0  0  0  0  0  0  0  0  0  0  0
    4.5251    1.3985   -2.6602 C   0  0  0  0  0  0  0  0  0  0  0  0
    1.7721    0.7844    2.1367 O   0  0  0  0  0  0  0  0  0  0  0  0
    4.8097    1.0175   -4.0077 O   0  0  0  0  0  0  0  0  0  0  0  0
  1  2  1  0      
  2  3  1  0      
  3  4  1  0      
  4  5  1  0      
  5  6  1  0      
  6  1  1  0      
  4  7  1  0      
  7  8  1  0      
  8  9  2  0      
  9 10  1  0      
 10  5  1  0      
  9 11  1  0      
 11 12  1  0      
 11 13  1  0      
 13 14  1  0      
 14 15  1  0      
 15 12  1  0      
 16 17  1  0      
 17 18  1  0      
 18 15  1  0      
 19 20  1  0      
 20 21  1  0      
 21 16  1  0      
  2 22  1  0      
  5 23  1  0      
 11 24  1  0      
 10 25  2  0      
 18 26  1  0      
 20 27  1  0      
 12 28  1  0      
 15 29  1  0      
 12 30  1  0      
 30 31  1  0      
  4 32  1  0      
  7 32  1  0      
 31 33  1  0      
M  END
$$$$
