# Supplementary material for: Secosteroids and Norcembranoids from the Soft Coral Sinularia nanolobata
Source: MDPI journal article supplement (doi:10.3390/md11093288), 2013-08-27
Supplement: s13 [file s13]

marinedrugs-11-03288-s006.mol
  ChemDraw12021317192D

 33 36  0  0  0  0  0  0  0  0999 V2000
   -3.6929   -0.5897    0.0000 C   0  0  0  0  0  0  0  0  0  0  0  0
   -3.6929   -1.4147    0.0000 C   0  0  0  0  0  0  0  0  0  0  0  0
   -2.9784   -1.8272    0.0000 C   0  0  0  0  0  0  0  0  0  0  0  0
   -2.2639   -1.4147    0.0000 C   0  0  0  0  0  0  0  0  0  0  0  0
   -2.2639   -0.5897    0.0000 C   0  0  0  0  0  0  0  0  0  0  0  0
   -2.9784   -0.1772    0.0000 C   0  0  0  0  0  0  0  0  0  0  0  0
   -1.5495   -1.8272    0.0000 C   0  0  0  0  0  0  0  0  0  0  0  0
   -0.8350   -1.4147    0.0000 C   0  0  0  0  0  0  0  0  0  0  0  0
   -0.8350   -0.5897    0.0000 C   0  0  0  0  0  0  0  0  0  0  0  0
   -1.5495   -0.1772    0.0000 C   0  0  0  0  0  0  0  0  0  0  0  0
   -0.1205   -0.1772    0.0000 C   0  0  0  0  0  0  0  0  0  0  0  0
   -0.1205    0.6478    0.0000 C   0  0  0  0  0  0  0  0  0  0  0  0
    0.6641   -0.4322    0.0000 C   0  0  0  0  0  0  0  0  0  0  0  0
    1.1490    0.2353    0.0000 C   0  0  0  0  0  0  0  0  0  0  0  0
    0.6641    0.9027    0.0000 C   0  0  0  0  0  0  0  0  0  0  0  0
    2.3051    1.0752    0.0000 C   0  0  0  0  0  0  0  0  0  0  0  0
    1.8201    1.7426    0.0000 C   0  0  0  0  0  0  0  0  0  0  0  0
    0.9997    1.6564    0.0000 C   0  0  0  0  0  0  0  0  0  0  0  0
    3.2749   -0.2597    0.0000 C   0  0  0  0  0  0  0  0  0  0  0  0
    3.6105    0.4940    0.0000 C   0  0  0  0  0  0  0  0  0  0  0  0
    3.1255    1.1614    0.0000 C   0  0  0  0  0  0  0  0  0  0  0  0
   -4.4074   -1.8272    0.0000 O   0  0  0  0  0  0  0  0  0  0  0  0
   -2.2639    0.2353    0.0000 C   0  0  0  0  0  0  0  0  0  0  0  0
   -0.1205   -1.0022    0.0000 H   0  0  0  0  0  0  0  0  0  0  0  0
   -1.5632    0.4415    0.0000 O   0  0  0  0  0  0  0  0  0  0  0  0
    0.4163    2.2397    0.0000 C   0  0  0  0  0  0  0  0  0  0  0  0
    4.4074    0.7075    0.0000 C   0  0  0  0  0  0  0  0  0  0  0  0
   -0.0518    1.4865    0.0000 C   0  0  0  0  0  0  0  0  0  0  0  0
    1.5434    1.0064    0.0000 H   0  0  0  0  0  0  0  0  0  0  0  0
   -0.7039    1.2311    0.0000 C   0  0  0  0  0  0  0  0  0  0  0  0
   -1.5008    1.0176    0.0000 C   0  0  0  0  0  0  0  0  0  0  0  0
   -2.2639   -2.2397    0.0000 O   0  0  0  0  0  0  0  0  0  0  0  0
   -2.0841    1.6010    0.0000 O   0  0  0  0  0  0  0  0  0  0  0  0
  1  2  1  0      
  2  3  1  0      
  3  4  1  0      
  4  5  1  0      
  5  6  1  0      
  6  1  1  0      
  4  7  1  0      
  7  8  1  0      
  8  9  2  0      
  9 10  1  0      
 10  5  1  0      
  9 11  1  0      
 11 12  1  0      
 11 13  1  0      
 13 14  1  0      
 14 15  1  0      
 15 12  1  0      
 16 17  1  0      
 17 18  1  0      
 18 15  1  0      
 19 20  1  0      
 20 21  1  0      
 21 16  1  0      
  2 22  1  1      
  5 23  1  1      
 11 24  1  6      
 10 25  2  0      
 18 26  1  6      
 20 27  1  0      
 12 28  1  1      
 15 29  1  6      
 12 30  1  0      
 30 31  1  0      
  4 32  1  1      
  7 32  1  1      
 31 33  1  0      
M  END
